# Supplementary material for: Factors associated with advanced stage at diagnosis of cervical cancer in Addis Ababa, Ethiopia: a population-based study
Source: PubMed Central journal article supplement — BMJ Open. 2020 Oct 13;10(10):e040645. doi: 10.1136/bmjopen-2020-040645 (PMC7554500; doi:10.1136/bmjopen-2020-040645), 2020-10-13
Supplement: bmjopen-2020-040645.draft_revisions.pdf [file bmjopen-2020-040645.draft_revisions.pdf]

# BMJ Open

BMJ Open is committed to open peer review. As part of this commitment we make the peer review history of every article we publish publicly available.

When an article is published we post the peer reviewers' comments and the authors' responses online. We also post the versions of the paper that were used during peer review. These are the versions that the peer review comments apply to.

The versions of the paper that follow are the versions that were submitted during the peer review process. They are not the versions of record or the final published versions. They should not be cited or distributed as the published version of this manuscript.

BMJ Open is an open access journal and the full, final, typeset and author-corrected version of record of the manuscript is available on our site with no access controls, subscription charges or pay-per-view fees (<http://bmjopen.bmj.com>).

If you have any questions on BMJ Open's open peer review process please email [info.bmjopen@bmj.com](mailto:info.bmjopen@bmj.com)

# BMJ Open

## Patterns and associated factors of advanced stage at diagnosis of cervical cancer in Addis Ababa, Ethiopia: A population based study

|                               |                                                                                                                                                                                                                                                                                                                                                                                                                                                                                                                                                                                                                                                                                                                                                                                                                                                                                                                                                                 |
|-------------------------------|-----------------------------------------------------------------------------------------------------------------------------------------------------------------------------------------------------------------------------------------------------------------------------------------------------------------------------------------------------------------------------------------------------------------------------------------------------------------------------------------------------------------------------------------------------------------------------------------------------------------------------------------------------------------------------------------------------------------------------------------------------------------------------------------------------------------------------------------------------------------------------------------------------------------------------------------------------------------|
| Journal:                      | <i>BMJ Open</i>                                                                                                                                                                                                                                                                                                                                                                                                                                                                                                                                                                                                                                                                                                                                                                                                                                                                                                                                                 |
| Manuscript ID                 | bmjopen-2020-040645                                                                                                                                                                                                                                                                                                                                                                                                                                                                                                                                                                                                                                                                                                                                                                                                                                                                                                                                             |
| Article Type:                 | Original research                                                                                                                                                                                                                                                                                                                                                                                                                                                                                                                                                                                                                                                                                                                                                                                                                                                                                                                                               |
| Date Submitted by the Author: | 18-May-2020                                                                                                                                                                                                                                                                                                                                                                                                                                                                                                                                                                                                                                                                                                                                                                                                                                                                                                                                                     |
| Complete List of Authors:     | Dereje, Nebiyu; Addis Ababa University College of Health Sciences, Preventive Medicine; Wachemo University, Public Health<br>Gebremariam, Alem; Adigrat University College of Health Sciences, Public Health; Addis Ababa University College of Health Sciences, Preventive Medicine<br>Addissie, Adamu; Addis Ababa University College of Health Sciences, Preventive Medicine<br>Worku, Alemayehu; Addis Ababa University College of Health Sciences, Preventive Medicine<br>Assefa, Mathewos ; Addis Ababa University School of Medicine, Oncology<br>Abraha, Aynalem; Addis Ababa University School of Medicine, Oncology<br>Tigeneh, Wondemagegnehu; Addis Ababa University School of Medicine, Oncology<br>Kantelhardt, Eva; Martin-Luther-Universitat Halle-Wittenberg, Institute for Medical Epidemiology, Biostatistics and Informatics; Department of Gynaecology<br>Jemal, Ahmedin; American Cancer Society, Surveillance & Health Services Research |
| Keywords:                     | Gynaecological oncology < GYNAECOLOGY, Epidemiology < ONCOLOGY, PUBLIC HEALTH                                                                                                                                                                                                                                                                                                                                                                                                                                                                                                                                                                                                                                                                                                                                                                                                                                                                                   |
|                               |                                                                                                                                                                                                                                                                                                                                                                                                                                                                                                                                                                                                                                                                                                                                                                                                                                                                                                                                                                 |

SCHOLARONE™  
Manuscripts

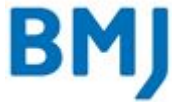

I, the Submitting Author has the right to grant and does grant on behalf of all authors of the Work (as defined in the below author licence), an exclusive licence and/or a non-exclusive licence for contributions from authors who are: i) UK Crown employees; ii) where BMJ has agreed a CC-BY licence shall apply, and/or iii) in accordance with the terms applicable for US Federal Government officers or employees acting as part of their official duties; on a worldwide, perpetual, irrevocable, royalty-free basis to BMJ Publishing Group Ltd ("BMJ") its licensees and where the relevant Journal is co-owned by BMJ to the co-owners of the Journal, to publish the Work in this journal and any other BMJ products and to exploit all rights, as set out in our [licence](#).

The Submitting Author accepts and understands that any supply made under these terms is made by BMJ to the Submitting Author unless you are acting as an employee on behalf of your employer or a postgraduate student of an affiliated institution which is paying any applicable article publishing charge ("APC") for Open Access articles. Where the Submitting Author wishes to make the Work available on an Open Access basis (and intends to pay the relevant APC), the terms of reuse of such Open Access shall be governed by a Creative Commons licence – details of these licences and which [Creative Commons](#) licence will apply to this Work are set out in our licence referred to above.

Other than as permitted in any relevant BMJ Author's Self Archiving Policies, I confirm this Work has not been accepted for publication elsewhere, is not being considered for publication elsewhere and does not duplicate material already published. I confirm all authors consent to publication of this Work and authorise the granting of this licence.

1  
2  
3 **1 Patterns and associated factors of advanced stage at diagnosis of cervical**  
4  
5  
6 **2 cancer in Addis Ababa, Ethiopia: A population based study**  
7  
8

9 3 Nebiyu Dereje<sup>1\*</sup>, Alem Gebremariam<sup>2</sup>, Adamu Addissie<sup>3</sup>, Alemayehu Worku<sup>4</sup>, Mathewos  
10 4 Assefa<sup>5</sup>, Aynalem Abraha<sup>6</sup>, Wondemagegnehu Tigeneh<sup>7</sup>, Eva Johanna Kantelhardt<sup>8</sup> and  
11 5 Ahmedin Jemal<sup>9</sup>  
12  
13  
14  
15

16  
17 6 <sup>1</sup>Department of Preventive Medicine, School of Public health, Addis Ababa University;  
18 7 Department of Public Health, Wachemo University; Email [neba.jahovy@gmail.com](mailto:neba.jahovy@gmail.com)  
19

20 8 <sup>2</sup>Department of Public Health, Adigrat University; Email [alem25@gmail.com](mailto:alem25@gmail.com)  
21

22 9 <sup>3</sup>Department of Preventive Medicine, School of Public health, Addis Ababa University; Email  
23 10 [adamuaddis@yahoo.com](mailto:adamuaddis@yahoo.com)  
24

25 11 <sup>4</sup>Department of Preventive Medicine, School of Public health, Addis Ababa University; Email  
26 12 [alemayehuwy@yahoo.com](mailto:alemayehuwy@yahoo.com)  
27

28 13 <sup>5</sup>Department of Oncology, School of Medicine, Addis Ababa University; Email  
29 14 [mathewosassefa80@hotmail.com](mailto:mathewosassefa80@hotmail.com)  
30

31 15 <sup>6</sup>Department of Oncology, School of Medicine, Addis Ababa University; Email  
32 16 [aynalemab@yahoo.co.uk](mailto:aynalemab@yahoo.co.uk)  
33

34 17 <sup>7</sup>Department of Oncology, School of Medicine, Addis Ababa University; Email  
35 18 [tigeneh@yahoo.com](mailto:tigeneh@yahoo.com)  
36

37 19 <sup>8</sup>Department of Gynaecology, Martin-Luther-University Halle, Germany; Institute of Medical  
38 20 Epidemiology, Biostatistics and Informatics, Martin-Luther-University Halle, Germany; Email  
39 21 [eva.kantelhardt@uk-halle.de](mailto:eva.kantelhardt@uk-halle.de)  
40

41 22 <sup>9</sup>Surveillance & Health Services Research, American Cancer Society; Email  
42 23 [ahmedin.jemal@cancer.org](mailto:ahmedin.jemal@cancer.org)  
43

44 24 **\*Corresponding author**  
45  
46

47 25 Nebiyu Dereje; Email: [neba.jahovy@gmail.com](mailto:neba.jahovy@gmail.com) Mobile +251910148615; P.O.Box 667;  
48  
49  
50

51 26  
52  
53  
54  
55  
56  
57  
58  
59  
60

## 27 Abstract

28 **Objective:** To describe the patterns and associated factors of advanced stage at diagnosis of  
29 cervical cancer in Addis Ababa, Ethiopia

30 **Design:** A population based cross sectional study

31 **Setting:** The study was conducted in seven prominent cancer diagnosing health facilities in  
32 Addis Ababa, Ethiopia.

33 **Participants:** All histopathology confirmed incident cervical cancer patients diagnosed from  
34 January 2017 to June 2018 among Addis Ababa residents were included.

35 **Outcome measures:** A face to face interview was administered to the patients using a structured  
36 questionnaire. Additional clinical data were extracted from patients' medical records. Stage at  
37 diagnosis was grouped into early (Stage I and II) and advanced (Stage III and IV) according to  
38 FIGO staging criteria. Factors associated with advanced stage at diagnosis were examined by  
39 multi-variable analysis using Poisson regression with robust variance model.

40 **Results:** The mean age of the study participants was 52.9 years ( $\pm 13.3$  years). Nearly two-thirds  
41 (60.4%, 95% CI; 53.8%, 66.5%) of patients with cervical cancer were diagnosed at an advanced  
42 stage of the disease. Advanced stage at diagnosis was significantly associated with paying  
43 medical bill out of pocket (adjusted prevalence ratio (APR) = 1.44, 95% CI; 1.08, 1.91),  
44 diagnostic interval >90 days (APR = 1.31, 95% CI; 1.04, 1.71), practicing in religious activities  
45 or not taking immediate action following symptom recognition (APR = 1.25, 95% CI; 1.08,  
46 1.91), and visiting more than three different health facilities prior to diagnostic confirmation  
47 (APR = 1.24, 95% CI; 1.07, 1.51).

1  
2  
3 48 **Conclusion:** The findings of the study underscore the need to take measures to shorten  
4  
5 49 diagnostic waiting times for cervical cancer, increase the affordability of cancer care and creating  
6  
7  
8 50 awareness on the severity of cervical cancer in addition to screening options.  
9

10  
11 51 **Key words:** Stage at diagnosis, Advanced stage, Delays, Cervical cancer  
12  
13

## 14 52 **Article Summary**

### 15 16 17 53 **Strengths and limitations of this study**

- 18  
19  
20 54 • It is the first population based study to describe the patterns and associated factors of  
21  
22 55 stage at diagnosis among incident histologically confirmed cervical cancer cases in Addis  
23  
24 56 Ababa, Ethiopia
- 25  
26  
27 57 • The patients were recruited prospectively and primary data collection methods were used.
- 28  
29  
30 58 • Some patients might never have visited the health facilities and were not included in our  
31  
32 59 study.
- 33  
34  
35 60 • Recall bias on the dates of symptom recognition and presentations might have also  
36  
37 61 affected our findings.  
38  
39

### 40 62 **Funding statement**

41  
42 63 This work was supported by American Cancer Society  
43  
44  
45

### 46 64 **Conflict of interest**

47  
48 65 The authors declare that they have no conflict of interests.  
49  
50

51  
52 66 **Word count of main text:** 2011  
53  
54  
55  
56  
57  
58  
59  
60

## 67 **Introduction**

68 Cervical cancer is the second leading cause of cancer death in females in Ethiopia and other parts  
69 of Africa [1, 2]. Although cervical cancer can be prevented by detecting and removal of  
70 precancerous lesions and treated successfully if detected early [3], majority of patients in  
71 Ethiopia [4, 5] and many other parts of Africa are diagnosed at advanced stage of the disease [6-  
72 9], when the choice of treatment is limited and the probability of survival is poor. However, the  
73 findings on stage distribution in Ethiopia and in most parts of Africa are based on hospital-based  
74 studies rather than population-based studies and they cannot be generalizable.

75 Several previous studies from Sub-Saharan Africa countries associated advanced-stage cervical  
76 cancer diagnosis with low-level community awareness of the disease [10] and with lack of  
77 screening services and diagnostic facilities [8, 11]. No previous study in the region, however,  
78 examined the associations between advanced-stage diagnosis and source of medical bill  
79 coverage, and other health-related patient behaviours and health system factors such as delay in  
80 seeking medical consultation after recognition of symptoms and delay in receipt of diagnostic  
81 confirmation after healthcare provider consultation. Therefore, this study was conducted (1) to  
82 describe the stage distribution of cervical cancer (2) to identify factors associated with advanced  
83 stage of the disease in Addis Ababa, capital city of Ethiopia using all patients diagnosed from  
84 January 2017 through June 2018 among the residents of the city.

## 85 **Methods**

86 A multi-center prospective cross-sectional study was conducted among all newly diagnosed  
87 patients with cervical cancer among Addis Ababa residents during the 18 months study period  
88 from January 1, 2017 to June 30, 2018. There were 234 newly diagnosed patients during the

1  
2  
3 89 study period; however, three of them were not included in our study due to their plan to initiate  
4  
5 90 treatment out of Ethiopia. Also 19 patients without stage information were excluded from the  
6  
7  
8 91 study. The study participants were recruited from seven major public and private health facilities  
9  
10 92 in the city (representing 99% of cervical cancer incident cases among Addis Ababa residents).  
11  
12 93 Recruiting and tracing of the patients were guided by the Addis Ababa population-based cancer  
13  
14  
15 94 registry [12].  
16

17  
18 95 All the cervical cancer cases were confirmed by histopathology and staged according to FIGO by  
19  
20 96 senior gynecological oncologist or clinical oncologist [13]. Distance metastasis (Stage IVb) was  
21  
22 97 determined by reviewing chest x-ray and abdominal ultrasound findings [14].  
23

24  
25 98 The ethical approval of this study was obtained from the institutional review board of Addis  
26  
27 99 Ababa University College of Health Sciences. Written informed consent of the study participants  
28  
29 100 was also obtained. Data from the cervical cancer patients were collected by using structured  
30  
31 101 questionnaire, which was developed by reviewing previously conducted related articles [9, 11].  
32  
33  
34 102 Initially the questionnaire was prepared by English and later translated to Amharic, the national  
35  
36 103 language. Consistency of the questionnaire translation was checked by back translation by  
37  
38 104 independent translator and its contents were validated by the experts (gynecologists and  
39  
40 105 oncologists). A Face to face interview was administered by trained nurse interviewers at around  
41  
42  
43 106 the time of diagnosis.  
44

45  
46 107 For extracting patients' clinical information, medical charts were reviewed and data were  
47  
48 108 extracted by junior oncologists (residents) using a structured checklist. Any inconsistency in the  
49  
50  
51 109 patient information was resolved by consulting senior oncologists during the data extraction. The  
52  
53 110 histological results were extracted from the pathology reports.  
54  
55  
56  
57  
58  
59  
60



1  
2  
3 111 Total diagnostic interval was defined as an interval from first date of symptom recognition by the  
4  
5 112 patients to the histological confirmation of the diagnosis. Total diagnostic interval was  
6  
7  
8 113 considered delayed if the interval was >90 days [15-17].  
9

10  
11 114 The outcome variable of the study was stage at diagnosis, which was grouped in to two as early  
12  
13 115 (stage I/II) and advanced (stage III/IV). The independent variables considered were: socio-  
14  
15 116 demographic variables (age, educational status, marital status, family income, source of medical  
16  
17 117 expense coverage), tumour related variables (tumour type), patient related factors (comorbidity,  
18  
19 118 diagnostic delays and number of health facility visited prior to diagnostic confirmation).  
20  
21  
22

23 119 Descriptive analyses were used to calculate summary statistics of frequencies, proportion,  
24  
25 120 median, mean and standard deviations. Bivariate and multi-variable analysis using a Poisson  
26  
27 121 regression with robust variance method were used to identify factors associated with patient's  
28  
29 122 being at an advanced stage of cervical cancer at diagnosis. The Poisson regression with robust  
30  
31 123 variance method was used to directly estimate the prevalence ratio (the effect measure), since the  
32  
33 124 odds ratio (logistic regression) over-estimates the effect when the prevalence (magnitude) of the  
34  
35 125 outcome variable is not rare (>10%) [18]. Those variables with  $p$  value <0.25 in the bivariate  
36  
37 126 analysis were considered for the multi-variable analysis in the Poisson regression model. Level  
38  
39 127 of significance was set at  $p$  – value below 0.05 at 95% CI and prevalence ratio (PR) was used to  
40  
41 128 quantify the strength of association for each of the variables. Post estimation fitness of model  
42  
43 129 was checked by chi-square based goodness of fit test and the final model was found to be fit ( $p$   
44  
45 130 value = 0.95). There were no multicollinearity between the variables using the collinearity  
46  
47 131 diagnostics (variance inflation factors (VIF) and tolerance). In accordance with the journal's  
48  
49 132 guidelines, we will provide our data for the reproducibility of this study in other centers if such is  
50  
51 133 requested.  
52  
53  
54  
55  
56  
57  
58  
59  
60

### 134 **Patient and public involvement**

135 Neither patients nor public were involved in the design of this study.

## 136 **Results**

### 137 **Socio-demographic and clinical characteristics**

138 The mean age of the study participants (n = 212) was 52.9 years ( $\pm$ 13.3 years), where the  
 139 majority of the patients with cervical cancer were below 60 years old (68.4%), Christians  
 140 (91.5%), and housewives (63.2%). More than two-thirds (67.5%) of the patients had a family  
 141 monthly income below 3200 ETB (100 USD) and more than two-thirds (68.4%) were not  
 142 entitled to free medical service. Only 2.8% of the patients have a family history of cervical  
 143 cancer. Majority of the patients (98.6%) were non-smokers, however about a quarter (23.6%) of  
 144 the patients were alcohol users. More than two-thirds (68.4%) of patients pay their medical  
 145 expenses out of their pockets (Table 1). More than two-thirds (69.8%) of the patients had tumor  
 146 size of greater than 4cm. Majority of the cervical cancer cases (91.0%) had a squamous cell  
 147 carcinoma. About one in five (21.7%) cervical cancer patients were HIV positive and all were on  
 148 antiretroviral therapy (ART).

149 Table 1: Socio-demographic and clinical characteristics of patients with cervical cancer in Addis  
 150 Ababa

| Variables     | Frequency (percent) |
|---------------|---------------------|
| <b>Age</b>    |                     |
| <40 years     | 42 (19.8%)          |
| 40 – 59 years | 103 (48.6%)         |

|                                                                                     |             |
|-------------------------------------------------------------------------------------|-------------|
| ≥60 years                                                                           | 67 (31.6%)  |
| <b>Formal education</b>                                                             |             |
| No                                                                                  | 86 (40.6%)  |
| Yes                                                                                 | 126 (59.4%) |
| <b>Family monthly income</b>                                                        |             |
| ≤3200 ETB                                                                           | 143 (67.5%) |
| >3200 ETB                                                                           | 69 (32.5%)  |
| <b>Source of medical expenses</b>                                                   |             |
| Out of pocket                                                                       | 145 (68.4%) |
| Free/insured                                                                        | 67 (31.6%)  |
| <b>Immediate action after symptom recognition</b>                                   |             |
| Went to health facility                                                             | 149 (70.3%) |
| No action/ Religious activity                                                       | 63 (29.7%)  |
| <b>Number of different health facilities visited before diagnostic confirmation</b> |             |
| ≤3 health facilities                                                                | 142 (67.0%) |
| >3 health facilities                                                                | 70 (33.0%)  |
| <b>Diagnostic interval</b>                                                          |             |
| ≤90 days                                                                            | 68 (32.1%)  |
| >90 days                                                                            | 144 (67.9%) |
| <b>HIV infection</b>                                                                |             |
| Yes                                                                                 | 46 (21.7%)  |
| No                                                                                  | 166 (78.3%) |
| <b>Tumor size</b>                                                                   |             |
| ≤4cm                                                                                | 64 (30.2%)  |
| >4cm                                                                                | 148 (69.8%) |

151

152

### 153 **Stage at diagnosis of cervical cancer**

154 Nearly two out of three (60.4%, 95% CI; 53.8%, 66.5%) patients with cervical cancer were  
 155 diagnosed at advanced stage of cancer, majority of them (37.3%) being diagnosed at stage IV  
 156 (Figure 1). About 5.2% of the patients with cervical cancer had metastasized cancer to lung  
 157 (2.4%), liver (2.4%) and peritoneum (0.5%) at their diagnosis.

### 158 **Factors associated with advanced stage at diagnosis of cervical cancer**

159 In a bivariate analysis, advanced stage at diagnosis (stage III-IV) was significantly associated  
 160 with source of medical expenses, not going to health facilities immediately after symptom  
 161 recognition, visiting more than 3 different health facilities before diagnostic confirmation and  
 162 total diagnostic interval >90 days (Table 2).

163 Table 2: Bivariate association between advanced stage diagnosis of cervical cancer and  
 164 demographic and clinical characteristics in Addis Ababa, Ethiopia, 2018

| Variables                         | Advanced stage |            | P value |
|-----------------------------------|----------------|------------|---------|
|                                   | Yes            | No         |         |
| <b>Source of medical expenses</b> |                |            |         |
| Out of pocket                     | 99 (68.3%)     | 46 (31.7%) | 0.001   |
| Free/insured                      | 29 (43.3%)     | 38 (56.7%) |         |
| <b>Age</b>                        |                |            |         |
| <40 years                         | 16 (38.1%)     | 26 (61.9%) | 0.94    |
| 40 – 59 years                     | 42 (40.8%)     | 61 (59.2%) |         |
| ≥60 years                         | 26 (38.8%)     | 41 (61.2%) |         |

|                                                                                     |            |            |       |
|-------------------------------------------------------------------------------------|------------|------------|-------|
| <b>Formal education</b>                                                             |            |            |       |
| No                                                                                  | 54 (62.8%) | 32 (37.2%) | 0.51  |
| Yes                                                                                 | 74 (58.7%) | 52 (41.3%) |       |
| <b>Spouse living together</b>                                                       |            |            |       |
| Yes                                                                                 | 48 (56.5%) | 37 (43.5%) |       |
| No                                                                                  | 80 (63.0%) | 47 (37.0%) | 0.42  |
| <b>Family monthly income</b>                                                        |            |            |       |
| ≤3200 ETB                                                                           | 88 (61.5%) | 55 (38.5%) | 0.73  |
| >3200 ETB                                                                           | 40 (58.0%) | 29 (42.0%) |       |
| <b>Immediate action after symptom recognition</b>                                   |            |            |       |
| Went to health facility                                                             | 80 (53.7%) | 69 (46.3%) | 0.008 |
| No action/ Religious activity                                                       | 48 (76.2%) | 15 (23.8%) |       |
| <b>Number of different health facilities visited before diagnostic conformation</b> |            |            |       |
| ≤3 health facilities                                                                | 77 (54.2%) | 65 (55.8%) | 0.006 |
| >3 health facilities                                                                | 51 (72.9%) | 19 (27.1%) |       |
| <b>Diagnostic interval</b>                                                          |            |            |       |
| ≤90 days                                                                            | 33 (48.5%) | 35 (51.5%) | 0.02  |
| >90 days                                                                            | 95 (66.0%) | 49 (34.0%) |       |
| <b>HIV infection</b>                                                                |            |            |       |
| Yes                                                                                 | 31 (67.4%) | 15 (32.6%) | 0.35  |
| No                                                                                  | 97 (58.4%) | 69 (41.6%) |       |

165

166 In the multi-variable analysis (Table 3), the proportion of advanced stage at diagnosis of cervical  
 167 cancer was 1.4 times higher (Adjusted Prevalence Ratio (APR) = 1.44, 95% CI; 1.08, 1.91)  
 168 among those women who paid their medical expenses out of their pocket as compared to those  
 169 women who were entitled to free medical service or having health insurance coverage, and it was  
 170 1.3 times higher (APR = 1.31, 95% CI; 1.04, 1.71) among women with total diagnostic interval  
 171 of >90 days than those with  $\leq 90$  days. Similarly, the proportion of being diagnosed at an  
 172 advanced stage of cervical cancer was 1.25 times higher (APR = 1.25, 95% CI; 1.05, 1.53)  
 173 among those women who went to religious practices or do nothing immediately after their  
 174 symptom recognition as compared to those women who immediately went to the health facilities,  
 175 and 1.2 times higher (APR = 1.24, 95% CI; 1.08, 1.91) among those women who visited more  
 176 than three different health facilities prior to diagnostic confirmation compared to those who  
 177 visited  $\leq 3$  health facilities.

178 Table 3: Multi-variable analysis showing factors associated with advanced stage at diagnosis of  
 179 cervical cancer in Addis Ababa residents, 2018

| Variables                                 | Advanced stage |    | Crude PR (95%<br>CI) | Adjusted PR<br>(95% CI) | P value |
|-------------------------------------------|----------------|----|----------------------|-------------------------|---------|
|                                           | Yes            | No |                      |                         |         |
| <b>Medical expenses</b>                   |                |    |                      |                         |         |
| Out of pocket                             | 99             | 46 | 1.54 (1.15, 2.05)    | 1.44 (1.08, 1.91)       | 0.003   |
| Free/insured                              | 29             | 38 | 1.00                 | 1.00                    |         |
| <b>Immediate action<br/>after symptom</b> |                |    |                      |                         |         |
| Went to health facility                   | 80             | 69 | 1.00                 | 1.00                    |         |

|                                              |    |    |                   |                   |      |
|----------------------------------------------|----|----|-------------------|-------------------|------|
| No action/ Religious activity                | 48 | 15 | 1.38 (1.13, 1.69) | 1.25 (1.05, 1.53) | 0.02 |
| <b>Number of health facilities contacted</b> |    |    |                   |                   |      |
| ≤3 health facilities                         | 77 | 65 | 1.00              | 1.00              |      |
| >3 health facilities                         | 51 | 19 | 1.35 (1.10, 1.65) | 1.24 (1.07, 1.51) | 0.01 |
| <b>Diagnostic interval</b>                   |    |    |                   |                   |      |
| ≤90 days                                     | 33 | 35 | 1.00              | 1.00              |      |
| >90 days                                     | 95 | 49 | 1.45 (1.10, 1.91) | 1.31 (1.04, 1.71) | 0.02 |

## 180 Discussion

181 The present study provides data on cervical cancer stage distribution in Addis Ababa along with  
 182 its predictors based on a prospective, population-based, representative sample and primary data  
 183 sources. We found that nearly two-thirds of the patients with cervical cancer in Addis Ababa  
 184 were diagnosed at an advanced stage of the disease, and that financial hardship to cover medical  
 185 expenses and delays in diagnosis are major contributors to advanced stage at diagnosis.

186 Although our finding of high proportion of advanced-stage cervical cancer in Addis Ababa is  
 187 generally similar to findings from other sub-Saharan African countries [8, 11], it is slightly  
 188 higher than that reported from Kenya (53.9%) [9] and lower than that reported from Sudan  
 189 (71.5%) [19]. The higher proportion in Sudan in part reflects the predominantly rural resident  
 190 study participants, where access to health facilities is limited and health literacy is expected to be  
 191 lower. In contrast, the lower proportion in Kenyan study may reflect the higher coverage of

1  
2  
3 192 recent cervical cancer screening program in the country (14%) [20] as compared to Ethiopia  
4  
5 193 (0.6%) [21]. Additionally, the screening program created awareness on cervical cancer [20].  
6  
7

8  
9 194 Our finding also showed that the proportion of advanced stage cervical cancer was considerably  
10  
11 195 higher among women who waited for more than three months to receive diagnostic confirmation  
12  
13 196 after they noticed symptom compared to those waited for  $\leq 3$  months. Such long diagnostic  
14  
15 197 waiting time, which may lead to migration to higher-stage disease, in part reflects lack of  
16  
17 198 knowledge about cervical cancer among the general population and healthcare providers, as well  
18  
19 199 as lack of diagnostic infrastructure in the country [10]. These underscore the need for programs  
20  
21 200 to enhance knowledge of cervical cancer in the community in order to shorten delays in the  
22  
23 201 diagnosis of the disease.  
24  
25  
26

27  
28 202 More than four out of five patients, who went to practice religious activities immediately after  
29  
30 203 symptom recognition, were found to be diagnosed at advanced stage of cervical cancer. In  
31  
32 204 Ethiopia, it is common to see patients going to religious activities as a solution for their disease  
33  
34 205 [22]. This can affect their prompt health-seeking behavior and may contribute to advanced stage  
35  
36 206 at diagnosis. A qualitative study from Ethiopia reported that patients with cervical cancer have a  
37  
38 207 strong belief that *Tsebel* (holy water) will cure from the disease [10]. Similarly, seeking  
39  
40 208 traditional and religious practices for cervical cancer care have been associated with advanced-  
41  
42 209 stage disease in other parts of Africa [8].  
43  
44  
45

46  
47 210 Financial hardship is barrier to accessing health, leading to cancer progression and poor outcome  
48  
49 211 [23]. Consistent with our findings, previous studies conducted in Sudan [19] and Uganda [11]  
50  
51 212 associated advanced stage with financial difficulties or being uninsured. Other study conducted  
52  
53 213 among gynecologic cancer patients also reported that women with financial hardship are seven  
54  
55  
56  
57  
58  
59  
60



1  
2  
3 214 times more likely to avoid or delay their cancer care [24]. Providing free diagnostic and  
4  
5 215 treatment services to all women with cervical cancer needs to be incorporated into the  
6  
7 216 governments' strategy on cervical cancer care. This will be in line with the WHO's global efforts  
8  
9  
10 217 to ensure universal health coverage [25].  
11  
12

13 218 The strengths of this study are the use of population-based cancer registry and rigorous and  
14  
15 219 multiple data collection methods (patients' interview and medical record review) in a prospective  
16  
17 220 approach to document strong association between late-stage diagnosis and patient and health  
18  
19 221 system factors, including diagnosis delay, in African settings. However, the study has limitations  
20  
21 222 because some patients might never have visited the health facilities and were not included in our  
22  
23 223 study. Recall bias on the dates of symptom recognition and presentations might have also  
24  
25 224 affected our findings.  
26  
27  
28  
29

## 30 225 **Conclusions**

31  
32

33 226 Using a population-based study, we found that more than two-third of cervical cancer patients in  
34  
35 227 Addis Ababa are diagnosed at advanced stage of the disease, which was strongly associated with  
36  
37 228 diagnostic delay, failure to take immediate action following symptom recognition, and paying  
38  
39 229 medical bill out of pocket. These findings underscore the need to take measures to enhance  
40  
41 230 awareness about the severity of the disease and preventive measures among the general  
42  
43 231 population and healthcare providers, expand the availability of screening services, and increase  
44  
45 232 the affordability of cancer care in the city. Of note, implementing free diagnostic service would  
46  
47 233 ensure accessibility to care for increasing number of patients with precancerous lesion or early-  
48  
49 234 stage disease through the ongoing up scaled screening program by the Ethiopian government.  
50  
51  
52  
53  
54  
55  
56  
57  
58  
59  
60

1  
2  
3 235 **Declarations**  
4  
5

6 236 **Ethics Approval and Consent to Participate**  
7

8  
9 237 This study was approved by the Institutional Review Board (IRB) of Wachemo University  
10  
11 238 (Approval number: WCU/IRB/086/17). All participants of the study were informed about the  
12  
13 239 study and they gave their written consent to be included in the study.  
14  
15

16  
17 240 **Consent for publication**  
18

19 241 Not applicable  
20  
21

22  
23 242 **Availability of data and material**  
24

25 243 Data can be obtained from the corresponding author upon reasonable request.  
26  
27

28 244 **Author contributions**  
29

30  
31 245 ND, AG, AA, AW, MA, AJ were involved in the conception of the study, methodological design  
32  
33 246 of the study, analysis and interpretation of data, and manuscript writing. AA, WT, EK were  
34  
35 247 involved in the methodology of the study, data collection/extraction, visualization of the data and  
36  
37 248 interpretation of the data. All authors have revised the manuscript.  
38  
39  
40

41 249 **Acknowledgement**  
42

43  
44  
45 250 The authors want to acknowledge American Cancer Society for funding of this study and Addis  
46  
47 251 Ababa University College of Health Sciences for the administrative support. The authors are also  
48  
49 252 grateful to the participants of the study for their cooperation.  
50  
51

52  
53 253  
54  
55  
56  
57  
58  
59  
60

1  
2  
3 **254 References**  
4

- 5  
6 255 1. Bray F, Ferlay J, Soerjomataram I, Siegel RL, Torre LA, Jemal A. Global cancer statistics  
7  
8 256 2018: GLOBOCAN estimates of incidence and mortality worldwide for 36 cancers in 185  
9  
10 257 countries. *CA Cancer J Clin*. 2018;68(6):394-424.  
11  
12 258 2. de Martel C, Plummer M, Vignat J, Franceschi S. Worldwide burden of cancer attributable to  
13  
14 259 HPV by site, country and HPV type. *Int J Cancer*. 2017;141(4):664-70.  
15  
16 260 3. Gauravi AM, Sharmila AP, Surendra SS. An overview of prevention and early detection of  
17  
18 261 cervical cancers. *Indian J Med Paediatr Oncol*. 2011 Jul-Sep;32(3):125–32.  
19  
20 262 4. Begoihn M, Mathewos A, Aynalem A, Wondemagegnehu T, Moelle U, Gizaw M, et al.  
21  
22 263 Cervical cancer in Ethiopia - predictors of advanced stage and prolonged time to diagnosis.  
23  
24 264 Infectious agents and cancer. 2019;14:36.  
25  
26 265 5. Kantelhardt EJ, Moelle U, Begoihn M, Addissie A, Trocchi P, Yonas B, et al. Cervical cancer  
27  
28 266 in Ethiopia: survival of 1,059 patients who received oncologic therapy. *The oncologist*.  
29  
30 267 2014;19:727-34  
31  
32 268 6. Jemal AB, F. Forman, D. O'Brien, M. Ferlay, J. Center, M. Parkin, et al. Cancer burden in  
33  
34 269 Africa and opportunities for prevention. *Cancer*. 2012;118(18):4372-84.  
35  
36 270 7. Dunyo P, Effah K, Udofia EA. Factors associated with late presentation of cervical cancer  
37  
38 271 cases at a district hospital: a retrospective study. *BMC Public Health*. 2018;18(1):1156.  
39  
40 272 8. Mlange RM, D. Rambau, P. Kidenya. Patient and disease characteristics associated with late  
41  
42 273 tumour stage at presentation of cervical cancer in northwestern Tanzania. *BMC Womens Health*.  
43  
44 274 2016;16:5.  
45  
46  
47  
48  
49  
50  
51  
52  
53  
54  
55  
56  
57  
58  
59  
60

- 1  
2  
3 275 9. Kirema MF, Wagoro M, Carole A, Michael H. Socio-Demographic Factors Associated with  
4  
5 276 Advanced Stage of Cervical Cancer at Diagnosis in Kenyatta National Hospital, Kenya: A Cross  
6  
7 277 Sectional Study. *J Cancer Sci Ther.* 2017;9:554-61.
- 8  
9  
10 278 10. Zewdie B, Alemseged A, Tefera B, Amare D, Hailemariam S, Vivien T, et al. Health seeking  
11  
12 279 behavior for cervical cancer in Ethiopia: a qualitative study. *International Journal for Equity in*  
13  
14 280 *Health.* 2012;11(83).
- 15  
16  
17 281 11. Mwaka, Amos DG, Christopher OW, Edward MR, Martin W, Henry L, et al. Social,  
18  
19 282 demographic and healthcare factors associated with stage at diagnosis of cervical cancer: cross-  
20  
21 283 sectional study in a tertiary hospital in Northern Uganda. *BMJ Open.* 2016;6(1):e007690.
- 22  
23  
24 284 12. Genebo T, Asmare S, Assefa M, Adamu A, Solomon B, Tigeneh W, et al. First data from a  
25  
26 285 population based cancer registry in Ethiopia. *Cancer Epidemiology.* 2018;53:93 - 8.
- 27  
28  
29 286 13. FIGO Committee on Gynecologic Oncology. FIGO staging for carcinoma of the vulva,  
30  
31 287 cervix, and corpus uteri. *International Journal of Gynecology & Obstetrics.* 2014;125(2):97-8.
- 32  
33 288 14. C. Marth FL, S. Mahner, M. McCormack, A. Gonzalez-Martin, N. Colombo. Cervical  
34  
35 289 cancer: ESMO Clinical Practice Guidelines for diagnosis, treatment and follow-up. *Annals of*  
36  
37 290 *Oncology* 28 (Supplement 4). 2017.
- 38  
39  
40 291 15. Fatima O, Rahou ZH, Bouchra HR, Rachid B, Bouchra B, Abdelhalem Mesfioui. The  
41  
42 292 Measurement of Delay in Diagnosis and Treatment among Moroccan Women with Cervical  
43  
44 293 Cancer. *Cancer and Oncology Research.* 2017;5(1):10-9.
- 45  
46  
47 294 16. Deepak G, Gita K, Rajan P, Archana A, Jitendra P, Sharad RO. Estimates of delays in  
48  
49 295 diagnosis of cervical cancer in Nepal. *BMC Women's Health.* 2014; 14(29).
- 50  
51  
52 296 17. Deepak G, Jitendra P, Sharad RO. Factors Associated with Late Diagnosis of Cervical  
53  
54 297 Cancer in Nepal. *Asian Pac J Cancer Prev.* 2013;14(7):4373-7.

- 1  
2  
3 298 18. Barros AJ, Hirakata VN. Alternatives for logistic regression in cross-sectional studies: an  
4  
5 299 empirical comparison of models that directly estimate the prevalence ratio. *BMC medical*  
6  
7  
8 300 *research methodology*. 2003;3(1):21.
- 9  
10  
11 301 19. Ibrahim A, Rasch V, Pukkala E, Aro AR. Predictors of cervical cancer being at an advanced  
12  
13 302 stage at diagnosis in Sudan. *International journal of women's health*. 2011;3:385.
- 14  
15  
16 303 20. Ng'ang'a A, Nyangasi M, Nkonge NG, Gathitu E, Kibachio J, Gichangi P, et al. Predictors of  
17  
18 304 cervical cancer screening among Kenyan women: results of a nested case-control study in a  
19  
20 305 nationally representative survey. *BMC Public Health*. 2018;18(3):1221.
- 21  
22  
23 306 21. Bruni L AG, Serrano B, Mena M, Gómez D, Muñoz J, Bosch FX, de Sanjosé S. Human  
24  
25 307 Papillomavirus and Related Diseases in Ethiopia. *ICO/IARC Information Centre on HPV and*  
26  
27 308 *Cancer (HPV Information Centre)*, 2018.
- 28  
29  
30 309 22. Kebede W, Kebede K. Psychosocial experiences and needs of women diagnosed with  
31  
32 310 cervical cancer in Ethiopia. *International social work*. 2017;60(6):1632-46.
- 33  
34  
35 311 23. Perrone F, Jommi C, Di Maio M, Gimigliano A, Gridelli C, Pignata S, et al. The association  
36  
37 312 of financial difficulties with clinical outcomes in cancer patients: secondary analysis of 16  
38  
39 313 academic prospective clinical trials conducted in Italy†. *Annals of Oncology*. 2016;27(12):2224-  
40  
41 314 9.
- 42  
43  
44 315 24. Boubberhan S, Shea M, Kennedy A, Erlinger A, Stack-Dunbier H, Buss MK, et al. Financial  
45  
46 316 toxicity in gynecologic oncology. *Gynecologic Oncology*. 2019;154(1):8-12.
- 47  
48 317 25. Knaul FM, Bhadelia A, Atun R, Frenk J. Achieving effective universal health coverage and  
49  
50 318 diagonal approaches to care for chronic illnesses. *Health Affairs*. 2015;34(9):1514-22.
- 51  
52  
53 319  
54  
55 320

1  
2  
3 321 **Legend of Figure**  
4

5 322 Figure 1: FIGO stages of cervical cancer at diagnosis of patients residing in Addis Ababa, 2018  
6  
7

8  
9 323  
10  
11  
12  
13  
14  
15  
16  
17  
18  
19  
20  
21  
22  
23  
24  
25  
26  
27  
28  
29  
30  
31  
32  
33  
34  
35  
36  
37  
38  
39  
40  
41  
42  
43  
44  
45  
46  
47  
48  
49  
50  
51  
52  
53  
54  
55  
56  
57  
58  
59  
60

For peer review only

1  
2  
3  
4  
5  
6  
7  
8  
9  
10  
11  
12  
13  
14  
15  
16  
17  
18  
19  
20  
21  
22  
23  
24  
25  
26  
27  
28  
29  
30  
31  
32  
33  
34  
35  
36  
37  
38  
39  
40  
41  
42  
43  
44  
45  
46  
47  
48  
49  
50  
51  
52  
53  
54  
55  
56  
57  
58  
59  
60

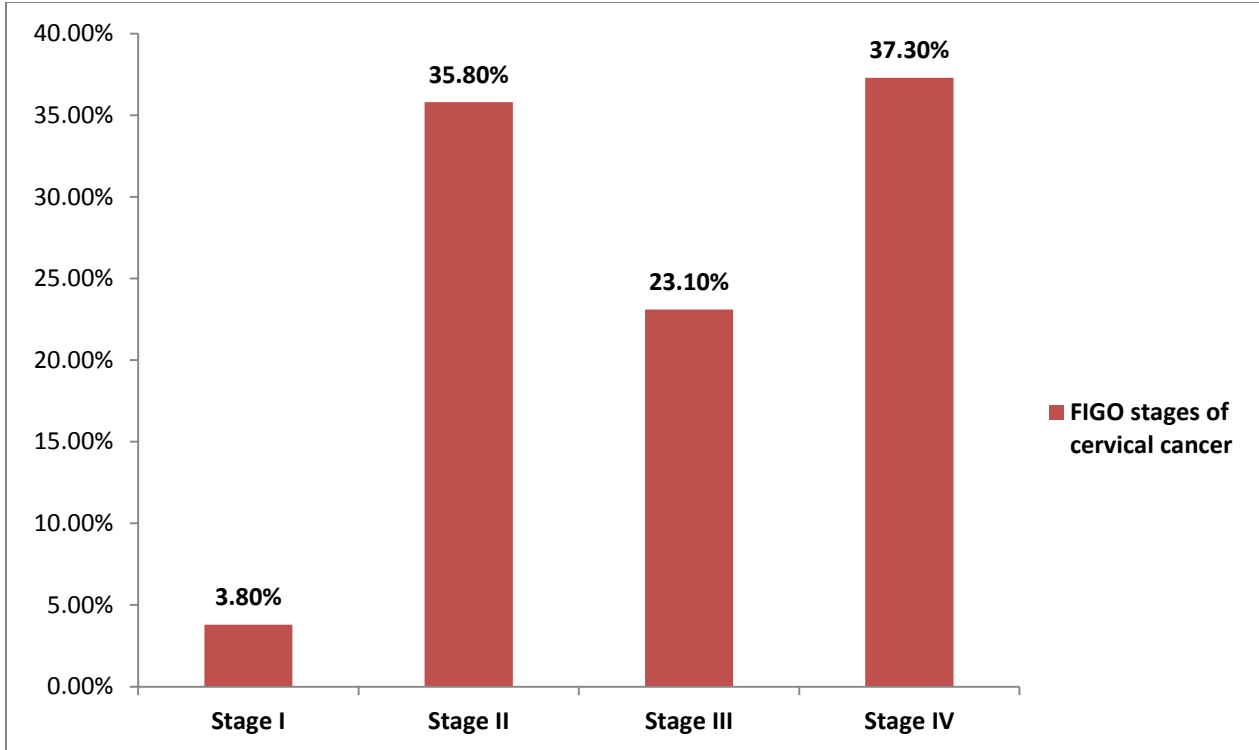

review only

## STROBE Statement—checklist of items that should be included in reports of observational studies

|                          | Item No. | Recommendation                                                                                                                                                                                                                                                                                                                                                                                                                                                         | Page No.                                                                                 |  |
|--------------------------|----------|------------------------------------------------------------------------------------------------------------------------------------------------------------------------------------------------------------------------------------------------------------------------------------------------------------------------------------------------------------------------------------------------------------------------------------------------------------------------|------------------------------------------------------------------------------------------|--|
| Title and abstract       | 1        | (a) Indicate the study's design with a commonly used term in the title or the abstract                                                                                                                                                                                                                                                                                                                                                                                 | Title page, Page No.1                                                                    |  |
|                          |          | (b) Provide in the abstract an informative and balanced summary of what was done and what was found                                                                                                                                                                                                                                                                                                                                                                    | Abstract, Page No.2                                                                      |  |
| <b>Introduction</b>      |          |                                                                                                                                                                                                                                                                                                                                                                                                                                                                        |                                                                                          |  |
| Background/rationale     | 2        | Explain the scientific background and rationale for the investigation being reported                                                                                                                                                                                                                                                                                                                                                                                   | Introduction, Page No. 4, Paragraph 1 and 2                                              |  |
| Objectives               | 3        | State specific objectives, including any prespecified hypotheses                                                                                                                                                                                                                                                                                                                                                                                                       | Introduction, Page No. 4, Paragraph 2                                                    |  |
| <b>Methods</b>           |          |                                                                                                                                                                                                                                                                                                                                                                                                                                                                        |                                                                                          |  |
| Study design             | 4        | Present key elements of study design early in the paper                                                                                                                                                                                                                                                                                                                                                                                                                | Methods, Page No. 5                                                                      |  |
| Setting                  | 5        | Describe the setting, locations, and relevant dates, including periods of recruitment, exposure, follow-up, and data collection                                                                                                                                                                                                                                                                                                                                        | Methods, Page No. 5                                                                      |  |
| Participants             | 6        | (a) <i>Cohort study</i> —Give the eligibility criteria, and the sources and methods of selection of participants. Describe methods of follow-up<br><i>Case-control study</i> —Give the eligibility criteria, and the sources and methods of case ascertainment and control selection. Give the rationale for the choice of cases and controls<br><i>Cross-sectional study</i> —Give the eligibility criteria, and the sources and methods of selection of participants | Methods, Page No. 5                                                                      |  |
|                          |          | (b) <i>Cohort study</i> —For matched studies, give matching criteria and number of exposed and unexposed<br><i>Case-control study</i> —For matched studies, give matching criteria and the number of controls per case                                                                                                                                                                                                                                                 | N/A                                                                                      |  |
| Variables                | 7        | Clearly define all outcomes, exposures, predictors, potential confounders, and effect modifiers. Give diagnostic criteria, if applicable                                                                                                                                                                                                                                                                                                                               | Methods, Data management and analysis, Page No. 6                                        |  |
| Data sources/measurement | 8*       | For each variable of interest, give sources of data and details of methods of assessment (measurement). Describe comparability of assessment methods if there is more than one group                                                                                                                                                                                                                                                                                   | Methods, Data tools and procedures, Page No. 5                                           |  |
| Bias                     | 9        | Describe any efforts to address potential sources of bias                                                                                                                                                                                                                                                                                                                                                                                                              | Methods, Data tools and procedures, Page No. 5; Data management and analysis, Page No. 6 |  |
| Study size               | 10       | Explain how the study size was arrived at                                                                                                                                                                                                                                                                                                                                                                                                                              | Methods, Page No. 5, study setting                                                       |  |



|                        |     |                                                                                                                                                                                                                                                                                                           |                                                   |  |
|------------------------|-----|-----------------------------------------------------------------------------------------------------------------------------------------------------------------------------------------------------------------------------------------------------------------------------------------------------------|---------------------------------------------------|--|
|                        |     |                                                                                                                                                                                                                                                                                                           | and design                                        |  |
| Quantitative variables | 11  | Explain how quantitative variables were handled in the analyses. If applicable, describe which groupings were chosen and why                                                                                                                                                                              | Methods, Data management and analysis, Page No. 6 |  |
| Statistical methods    | 12  | (a) Describe all statistical methods, including those used to control for confounding                                                                                                                                                                                                                     | Methods, Data management and analysis, Page 6     |  |
|                        |     | (b) Describe any methods used to examine subgroups and interactions                                                                                                                                                                                                                                       | Methods, Data management and analysis, Page No. 6 |  |
|                        |     | (c) Explain how missing data were addressed                                                                                                                                                                                                                                                               | N/A                                               |  |
|                        |     | (d) <i>Cohort study</i> —If applicable, explain how loss to follow-up was addressed<br><i>Case-control study</i> —If applicable, explain how matching of cases and controls was addressed<br><i>Cross-sectional study</i> —If applicable, describe analytical methods taking account of sampling strategy | N/A                                               |  |
|                        |     | (e) Describe any sensitivity analyses                                                                                                                                                                                                                                                                     | N/A                                               |  |
| <b>Results</b>         |     |                                                                                                                                                                                                                                                                                                           |                                                   |  |
| Participants           | 13* | (a) Report numbers of individuals at each stage of study—eg numbers potentially eligible, examined for eligibility, confirmed eligible, included in the study, completing follow-up, and analysed                                                                                                         | N/A                                               |  |
|                        |     | (b) Give reasons for non-participation at each stage                                                                                                                                                                                                                                                      | N/A                                               |  |
|                        |     | (c) Consider use of a flow diagram                                                                                                                                                                                                                                                                        | N/A                                               |  |
| Descriptive data       | 14* | (a) Give characteristics of study participants (eg demographic, clinical, social) and information on exposures and potential confounders                                                                                                                                                                  | Results, Page No. 7 and 8                         |  |
|                        |     | (b) Indicate number of participants with missing data for each variable of interest                                                                                                                                                                                                                       | Results, Page No. 7 and 8                         |  |
|                        |     | (c) <i>Cohort study</i> —Summarise follow-up time (eg, average and total amount)                                                                                                                                                                                                                          | N/A                                               |  |
| Outcome data           | 15* | <i>Cohort study</i> —Report numbers of outcome events or summary measures over time                                                                                                                                                                                                                       | N/A                                               |  |
|                        |     | <i>Case-control study</i> —Report numbers in each exposure category, or summary measures of exposure                                                                                                                                                                                                      | N/A                                               |  |
|                        |     | <i>Cross-sectional study</i> —Report numbers of outcome events or summary measures                                                                                                                                                                                                                        | Results, Page No. 8                               |  |
| Main results           | 16  | (a) Give unadjusted estimates and, if applicable, confounder-adjusted estimates and their precision (eg, 95% confidence interval). Make clear which confounders were adjusted for and why they were included                                                                                              | Results, Page No. 8                               |  |
|                        |     | (b) Report category boundaries when continuous variables were categorized                                                                                                                                                                                                                                 | N/A                                               |  |
|                        |     | (c) If relevant, consider translating estimates of relative risk into absolute risk for a meaningful time period                                                                                                                                                                                          | N/A                                               |  |

Continued on next page

|                          |    |                                                                                                                                                                            |                                         |  |
|--------------------------|----|----------------------------------------------------------------------------------------------------------------------------------------------------------------------------|-----------------------------------------|--|
| Other analyses           | 17 | Report other analyses done—eg analyses of subgroups and interactions, and sensitivity analyses                                                                             | N/A                                     |  |
| <b>Discussion</b>        |    |                                                                                                                                                                            |                                         |  |
| Key results              | 18 | Summarise key results with reference to study objectives                                                                                                                   | Discussion, Page No. 9, first paragraph |  |
| Limitations              | 19 | Discuss limitations of the study, taking into account sources of potential bias or imprecision. Discuss both direction and magnitude of any potential bias                 | Discussion, Page No. 11, last paragraph |  |
| Interpretation           | 20 | Give a cautious overall interpretation of results considering objectives, limitations, multiplicity of analyses, results from similar studies, and other relevant evidence | Conclusions, Page No. 11                |  |
| Generalisability         | 21 | Discuss the generalisability (external validity) of the study results                                                                                                      | Discussion, Page No. 11, last paragraph |  |
| <b>Other information</b> |    |                                                                                                                                                                            |                                         |  |
| Funding                  | 22 | Give the source of funding and the role of the funders for the present study and, if applicable, for the original study on which the present article is based              | Source of funding, Page No. 12          |  |

\*Give information separately for cases and controls in case-control studies and, if applicable, for exposed and unexposed groups in cohort and cross-sectional studies.

**Note:** An Explanation and Elaboration article discusses each checklist item and gives methodological background and published examples of transparent reporting. The STROBE checklist is best used in conjunction with this article (freely available on the Web sites of PLoS Medicine at <http://www.plosmedicine.org/>, Annals of Internal Medicine at <http://www.annals.org/>, and Epidemiology at <http://www.epidem.com/>). Information on the STROBE Initiative is available at [www.strobe-statement.org](http://www.strobe-statement.org).

# BMJ Open

## Factors associated with advanced stage at diagnosis of cervical cancer in Addis Ababa, Ethiopia: A population-based study

|                                 |                                                                                                                                                                                                                                                                                                                                                                                                                                                                                                                                                                                                                                                                                                                                                                                                                                                                                                                                                                 |
|---------------------------------|-----------------------------------------------------------------------------------------------------------------------------------------------------------------------------------------------------------------------------------------------------------------------------------------------------------------------------------------------------------------------------------------------------------------------------------------------------------------------------------------------------------------------------------------------------------------------------------------------------------------------------------------------------------------------------------------------------------------------------------------------------------------------------------------------------------------------------------------------------------------------------------------------------------------------------------------------------------------|
| Journal:                        | <i>BMJ Open</i>                                                                                                                                                                                                                                                                                                                                                                                                                                                                                                                                                                                                                                                                                                                                                                                                                                                                                                                                                 |
| Manuscript ID                   | bmjopen-2020-040645.R1                                                                                                                                                                                                                                                                                                                                                                                                                                                                                                                                                                                                                                                                                                                                                                                                                                                                                                                                          |
| Article Type:                   | Original research                                                                                                                                                                                                                                                                                                                                                                                                                                                                                                                                                                                                                                                                                                                                                                                                                                                                                                                                               |
| Date Submitted by the Author:   | 18-Aug-2020                                                                                                                                                                                                                                                                                                                                                                                                                                                                                                                                                                                                                                                                                                                                                                                                                                                                                                                                                     |
| Complete List of Authors:       | Dereje, Nebiyu; Addis Ababa University College of Health Sciences, Preventive Medicine; Wachemo University, Public Health<br>Gebremariam, Alem; Adigrat University College of Health Sciences, Public Health; Addis Ababa University College of Health Sciences, Preventive Medicine<br>Addissie, Adamu; Addis Ababa University College of Health Sciences, Preventive Medicine<br>Worku, Alemayehu; Addis Ababa University College of Health Sciences, Preventive Medicine<br>Assefa, Mathewos ; Addis Ababa University School of Medicine, Oncology<br>Abraha, Aynalem; Addis Ababa University School of Medicine, Oncology<br>Tigeneh, Wondemagegnehu; Addis Ababa University School of Medicine, Oncology<br>Kantelhardt, Eva; Martin-Luther-Universitat Halle-Wittenberg, Institute for Medical Epidemiology, Biostatistics and Informatics; Department of Gynaecology<br>Jemal, Ahmedin; American Cancer Society, Surveillance & Health Services Research |
| <b>Primary Subject Heading</b>: | Oncology                                                                                                                                                                                                                                                                                                                                                                                                                                                                                                                                                                                                                                                                                                                                                                                                                                                                                                                                                        |
| Secondary Subject Heading:      | Public health, Epidemiology                                                                                                                                                                                                                                                                                                                                                                                                                                                                                                                                                                                                                                                                                                                                                                                                                                                                                                                                     |
| Keywords:                       | Gynaecological oncology < GYNAECOLOGY, Epidemiology < ONCOLOGY, PUBLIC HEALTH                                                                                                                                                                                                                                                                                                                                                                                                                                                                                                                                                                                                                                                                                                                                                                                                                                                                                   |
|                                 |                                                                                                                                                                                                                                                                                                                                                                                                                                                                                                                                                                                                                                                                                                                                                                                                                                                                                                                                                                 |

SCHOLARONE™  
Manuscripts

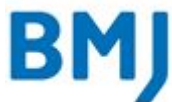

I, the Submitting Author has the right to grant and does grant on behalf of all authors of the Work (as defined in the below author licence), an exclusive licence and/or a non-exclusive licence for contributions from authors who are: i) UK Crown employees; ii) where BMJ has agreed a CC-BY licence shall apply, and/or iii) in accordance with the terms applicable for US Federal Government officers or employees acting as part of their official duties; on a worldwide, perpetual, irrevocable, royalty-free basis to BMJ Publishing Group Ltd ("BMJ") its licensees and where the relevant Journal is co-owned by BMJ to the co-owners of the Journal, to publish the Work in this journal and any other BMJ products and to exploit all rights, as set out in our [licence](#).

The Submitting Author accepts and understands that any supply made under these terms is made by BMJ to the Submitting Author unless you are acting as an employee on behalf of your employer or a postgraduate student of an affiliated institution which is paying any applicable article publishing charge ("APC") for Open Access articles. Where the Submitting Author wishes to make the Work available on an Open Access basis (and intends to pay the relevant APC), the terms of reuse of such Open Access shall be governed by a Creative Commons licence – details of these licences and which [Creative Commons](#) licence will apply to this Work are set out in our licence referred to above.

Other than as permitted in any relevant BMJ Author's Self Archiving Policies, I confirm this Work has not been accepted for publication elsewhere, is not being considered for publication elsewhere and does not duplicate material already published. I confirm all authors consent to publication of this Work and authorise the granting of this licence.

1  
2  
3 **1 Factors associated with advanced stage at diagnosis of cervical cancer in**  
4  
5  
6 **2 Addis Ababa, Ethiopia: A population-based study**  
7

8  
9 3 Nebiyu Dereje<sup>1\*</sup>, Alem Gebremariam<sup>2</sup>, Adamu Addissie<sup>3</sup>, Alemayehu Worku<sup>4</sup>, Mathewos  
10 4 Assefa<sup>5</sup>, Aynalem Abraha<sup>6</sup>, Wondemagegnehu Tigeneh<sup>7</sup>, Eva Johanna Kantelhardt<sup>8</sup> and  
11 5 Ahmedin Jemal<sup>9</sup>  
12  
13  
14  
15

16  
17 6 <sup>1</sup>Department of Preventive Medicine, School of Public health, Addis Ababa University;  
18 7 Department of Public Health, Wachemo University; Email [neba.jahovy@gmail.com](mailto:neba.jahovy@gmail.com)  
19

20 8 <sup>2</sup>Department of Public Health, Adigrat University; Email [alemg25@gmail.com](mailto:alemg25@gmail.com)  
21

22 9 <sup>3</sup>Department of Preventive Medicine, School of Public health, Addis Ababa University; Email  
23 10 [adamuaddis@yahoo.com](mailto:adamuaddis@yahoo.com)  
24

25 11 <sup>4</sup>Department of Preventive Medicine, School of Public health, Addis Ababa University; Email  
26 12 [alemayehuwy@yahoo.com](mailto:alemayehuwy@yahoo.com)  
27

28 13 <sup>5</sup>Department of Oncology, School of Medicine, Addis Ababa University; Email  
29 14 [mathewosassefa80@hotmail.com](mailto:mathewosassefa80@hotmail.com)  
30

31 15 <sup>6</sup>Department of Oncology, School of Medicine, Addis Ababa University; Email  
32 16 [aynalemab@yahoo.co.uk](mailto:aynalemab@yahoo.co.uk)  
33

34 17 <sup>7</sup>Department of Oncology, School of Medicine, Addis Ababa University; Email  
35 18 [tigeneh@yahoo.com](mailto:tigeneh@yahoo.com)  
36

37 19 <sup>8</sup>Department of Gynaecology, Martin-Luther-University Halle, Germany; Institute of Medical  
38 20 Epidemiology, Biostatistics and Informatics, Martin-Luther-University Halle, Germany; Email  
39 21 [eva.kantelhardt@uk-halle.de](mailto:eva.kantelhardt@uk-halle.de)  
40

41 22 <sup>9</sup>Surveillance & Health Services Research, American Cancer Society; Email  
42 23 [ahmedin.jemal@cancer.org](mailto:ahmedin.jemal@cancer.org)  
43

44 24 **\*Corresponding author**  
45  
46

47 25 Nebiyu Dereje; Email: [neba.jahovy@gmail.com](mailto:neba.jahovy@gmail.com) Mobile +251910148615; P.O.Box 667  
48  
49  
50

51 26  
52  
53  
54  
55  
56  
57  
58  
59  
60

## 27 **Abstract**

28 **Objective:** To describe the patterns and associated factors of advanced stage at diagnosis of  
29 cervical cancer in Addis Ababa residents, Ethiopia

30 **Design:** A population based cross sectional study

31 **Setting:** Seven major hospitals or diagnostic facilities in Addis Ababa, Ethiopia.

32 **Participants:** All histopathology confirmed incident cervical cancer patients diagnosed from  
33 January 01, 2017 to June 30, 2018 among Addis Ababa residents.

34 **Outcome measures:** The proportion of cervical cancer patients diagnosed at early-stage (Stage  
35 I and II) and advanced-stage (Stage III and IV) diseases according to FIGO staging criteria, and  
36 adjusted prevalence ratio (APR) for factors associated with advanced-stage diagnosis using  
37 Poisson regression with robust variance model.

38 **Results:** The mean age of the study participants was 52.9 years ( $\pm 13.3$  years). Nearly two-thirds  
39 (60.4%, 95%CI; 53.8%, 66.5%) of patients with cervical cancer were diagnosed at an advanced  
40 stage of the disease. Advanced stage at diagnosis was significantly associated with paying  
41 medical bill out of pocket (APR = 1.44, 95%CI; 1.08, 1.91), diagnostic interval >90 days (APR =  
42 1.31, 95%CI; 1.04, 1.71), practicing religion as a remedy or not taking immediate action  
43 following symptom recognition (APR = 1.25, 95%CI; 1.08, 1.91), and visiting >3 different  
44 health facilities prior to diagnostic confirmation (APR = 1.24, 95%CI; 1.07, 1.51).

45 **Conclusion:** Our findings of the high proportion advanced-stage diagnosis of cervical cancer in  
46 Addis Ababa and its strong associations with out of pocket medical bill, seeking care out of  
47 conventional medicine settings, and multiple visits to healthcare facilities before diagnostic

1  
2  
3 48 confirmations underscore the need for public policies to improve the affordability of cancer care,  
4  
5 49 and enhance community awareness about the severity of the disease and referral system, in  
6  
7  
8 50 addition to expanding cervical cancer screening.  
9

10  
11 51 **Key words:** Stage at diagnosis, Advanced stage, Delays, Cervical cancer  
12  
13

## 14 52 **Article Summary**

### 15 16 17 53 **Strengths and limitations of this study**

- 18  
19  
20 54 • It is the first population-based study to describe factors associated with advanced stage  
21  
22 55 cervical cancer diagnosis in African setting.
- 23  
24  
25 56 • All cervical incident cases in Addis Ababa may not have been included in the study  
26  
27 57 because some patients might never have visited healthcare facilities or visited local  
28  
29 58 healthcare facilities that do not report incident cancers to the central cancer registry.
- 30  
31  
32 59 • Recall bias about dates of symptom recognition and of presentations might have also  
33  
34 60 affected our findings.  
35  
36

### 37 38 61 **Funding statement**

39  
40 62 This work was supported by the American Cancer Society. Award/Grant number is not  
41  
42 63 applicable.  
43  
44

### 45 46 64 **Conflict of interest**

47  
48 65 The authors declare that they have no conflict of interests.  
49  
50

51 66 **Word count of main text:** 2050  
52  
53  
54  
55  
56  
57  
58  
59  
60

## 67 **Introduction**

68 Cervical cancer is the second leading cause of cancer death in females in Ethiopia and other parts  
69 of Africa ([1](#), [2](#)). Although cervical cancer can be prevented by detection and removal of  
70 precancerous lesions and treated successfully if detected early ([3](#)), the majority of patients in  
71 Ethiopia ([4](#), [5](#)) and many other parts of Africa are diagnosed at advanced stage of the disease ([6](#)-  
72 [9](#)), when the choice of treatment is limited and the probability of survival is poor. Previous  
73 findings on stage distribution in Ethiopia and in most parts of Africa, however, may not be  
74 generalizable as they were hospital-based studies rather than population-based studies.

75 Several previous studies from Sub-Saharan Africa countries associated advanced-stage cervical  
76 cancer diagnosis with low-level community awareness of the disease ([10](#)) and with lack of  
77 screening services and diagnostic facilities ([8](#), [11](#)). No previous study in the region, however,  
78 examined the associations between advanced-stage diagnosis and source of medical bill  
79 coverage, and other health-related patient behaviours and health system factors such as delay in  
80 seeking medical consultation after recognition of symptoms and delay in receipt of diagnostic  
81 confirmation after healthcare provider consultation. Therefore, this study was conducted to  
82 describe the stage distribution of cervical cancer in Addis Ababa residents and to identify factors  
83 associated with advanced stage of the disease based on all incident cancer cases diagnosed from  
84 January 01, 2017 through June 30, 2018 among the residents of the city.

85



## 86 **Methods**

87 A multi-center cross-sectional study was conducted among all newly diagnosed patients with  
88 cervical cancer among Addis Ababa residents during the 18 months study period from January 1,  
89 2017 to June 30, 2018. Patients were considered to be residents of the city if they lived at least 6  
90 months before date of diagnosis. Study participants were recruited from seven major hospitals or  
91 diagnostic facilities aided by the Addis Ababa Population-based Cancer Registry, which actively  
92 registers all incident cancer cases among the residents of the city ([12](#)). During the study period,  
93 234 histopathologically confirmed newly diagnosed patients were recorded in the registry. Of  
94 these patients, 22 patient were excluded from the study because of they sought treatment abroad  
95 (3 patients) or because of lack of stage information in their medical records (19 patients).

96 All the cervical cancer cases were confirmed by histopathology and staged according to the 2014  
97 International Federation of Gynaecology and Obstetrics (FIGO) criteria by senior gynaecological  
98 oncologist or clinical oncologist ([13](#)). In addition to physical examination, distant metastasis  
99 (Stage IVb) was determined by reviewing chest x-ray and abdominal ultrasound findings ([14](#)).

100 The ethical approval of this study was obtained from the Institutional Review Board of Addis  
101 Ababa University College of Health Sciences. Written informed consent of the study participants  
102 was also obtained. A face to face interview was administered by trained nurse interviewers at  
103 around the time of diagnosis to collect data on socio-demographic and health behaviors using a  
104 structured questionnaire, adapted from previous surveys ([9](#), [11](#)). Initially the questionnaire was  
105 prepared by English and later translated to Amharic, the national language. Consistency of the  
106 questionnaire translation was checked by back translation by an independent translator and its  
107 contents were validated by the experts (gynaecologists and oncologists).

1  
2  
3 108 Patient's clinical characteristics were extracted from medical charts by junior oncologists  
4  
5 109 (residents) using a structured checklist and any inconsistencies was resolved by consulting senior  
6  
7  
8 110 oncologists. Information on histology type and date of diagnostic confirmation was obtained  
9  
10 111 from pathology reports.

11  
12 112 Total diagnostic time interval was defined as the interval from t date of first symptom(s)  
13  
14 113 recognition by the patient to date of the histological confirmation of the diagnosis. Total  
15  
16 114 diagnostic interval was considered delayed if the interval was >90 days ([15-17](#)).

17  
18  
19  
20 115 The main outcome variable of the study was stage at diagnosis, which was grouped in to two:  
21  
22 116 early (stage I/II) and advanced (stage III/IV). The independent variables include socio-  
23  
24 117 demographic characteristics (age, educational status, marital status, family income, source of  
25  
26 118 medical expense coverage), clinical characteristics (histologic type, comorbidity), and other  
27  
28 119 patient or provider related factors (diagnostic delays and number of health facility visited prior to  
29  
30 120 diagnostic confirmation).

31  
32  
33  
34  
35 121 Descriptive analyses were used to calculate summary statistics of frequencies, proportion,  
36  
37 122 median, mean and standard deviations. Bivariate and multi-variable analysis using a Poisson  
38  
39 123 regression with robust variance method were used to identify factors associated with patient's  
40  
41 124 being at an advanced stage of cervical cancer at diagnosis. The Poisson regression with robust  
42  
43 125 variance method was used to directly estimate the prevalence ratio (the effect measure), since the  
44  
45 126 odds ratio (logistic regression) over-estimates the effect when the prevalence (magnitude) of the  
46  
47 127 outcome variable is not rare (>10%) ([18](#)). Those variables with  $p$  value <0.25 in the bivariate  
48  
49 128 analysis were considered for the multi-variable analysis in the Poisson regression model. Level  
50  
51 129 of significance was set at  $p$  – value below 0.05 at 95% CI and prevalence ratio (PR) was used to  
52  
53 130 quantify the strength of association for each of the variables. Post estimation fitness of this model

1  
2  
3 131 was checked by chi-square based goodness of fit test and the final model was found to be fit ( $p$   
4  
5 132 value = 0.95). There was no multicollinearity between the variables using the collinearity  
6  
7 133 diagnostics (variance inflation factors (VIF) and tolerance). In accordance with the journal's  
8  
9 134 guidelines, we will provide our data for the reproducibility of this study in other centers if such is  
10  
11 135 requested.  
12  
13  
14

## 15 136 **Patient and public involvement**

16  
17  
18 137 Neither patients nor the public were involved in the design of this study.  
19  
20

## 21 138 **Results**

### 22 139 **Socio-demographic and clinical characteristics**

23  
24  
25  
26  
27  
28 140 The mean age of the study participants ( $n = 212$ ) was 52.9 years ( $\pm 13.3$  years), with the majority  
29  
30 141 of them (68.4) below 60 years old (68.4%), Christians (91.5%), and housewives (63.2%). More  
31  
32 142 than two-thirds (67.5%) of the patients had a family monthly income below 3200 ETB (100  
33  
34 143 USD). Only 2.8% of the patients had a family history of cervical cancer. Majority of the patients  
35  
36 144 (98.6%) were non-smokers; however, about a quarter (23.6%) of the patients were alcohol users.  
37  
38 145 More than two-thirds (68.4%) of patients have paid their medical expenses out of pocket (**Table**  
39  
40 146 **1**). The extents of delays to diagnosis of cervical cancer (patient and diagnostic) were described  
41  
42 147 in previous publication ([19](#)).  
43  
44  
45  
46

47 148 More than two-thirds (69.8%) of the patients had tumor size of greater than 4cm. Majority of the  
48  
49 149 cervical cancer cases (91.0%) were a squamous cell carcinoma. About one in five (21.7%)  
50  
51 150 cervical cancer patients were HIV positive and all were on antiretroviral therapy (ART).  
52  
53  
54

55 151

152 Table 1: Socio-demographic and clinical characteristics of patients with cervical cancer in Addis

153 Ababa

| <b>Variables</b>                                                                    | <b>Frequency (percent)</b> |
|-------------------------------------------------------------------------------------|----------------------------|
| <b>Age</b>                                                                          |                            |
| <40 years                                                                           | 42 (19.8%)                 |
| 40 – 59 years                                                                       | 103 (48.6%)                |
| ≥60 years                                                                           | 67 (31.6%)                 |
| <b>Formal education</b>                                                             |                            |
| No                                                                                  | 86 (40.6%)                 |
| Yes                                                                                 | 126 (59.4%)                |
| <b>Family monthly income</b>                                                        |                            |
| ≤3200 ETB                                                                           | 143 (67.5%)                |
| >3200 ETB                                                                           | 69 (32.5%)                 |
| <b>Source of medical expenses</b>                                                   |                            |
| Out of pocket                                                                       | 145 (68.4%)                |
| Free/insured                                                                        | 67 (31.6%)                 |
| <b>Immediate action after symptom recognition</b>                                   |                            |
| Went to health facility                                                             | 149 (70.3%)                |
| No action/ Religious activity                                                       | 63 (29.7%)                 |
| <b>Number of different health facilities visited before diagnostic confirmation</b> |                            |
| ≤3 health facilities                                                                | 142 (67.0%)                |
| >3 health facilities                                                                | 70 (33.0%)                 |
| <b>Diagnostic interval</b>                                                          |                            |
| ≤90 days                                                                            | 68 (32.1%)                 |
| >90 days                                                                            | 144 (67.9%)                |
| <b>HIV infection</b>                                                                |                            |
| Yes                                                                                 | 46 (21.7%)                 |

|                   |             |
|-------------------|-------------|
| No                | 166 (78.3%) |
| <b>Tumor size</b> |             |
| ≤4cm              | 64 (30.2%)  |
| >4cm              | 148 (69.8%) |

154

### 155 **Stage at diagnosis of cervical cancer**

156 Nearly two out of three (60.4%, 95%CI; 53.8%, 66.5%) patients with cervical cancer were  
 157 diagnosed at advanced stage of cancer, with 37.3% of them diagnosed at stage IV (**Figure 1**).  
 158 Further, for about 5.2% of the patients, the disease had metastasized to lung (2.4%), liver (2.4%)  
 159 or peritoneum (0.5%) at diagnosis.

### 160 **Factors associated with advanced stage at diagnosis of cervical cancer**

161 In a bivariate analysis (Supplementary material), advanced stage at diagnosis (stage III-IV) was  
 162 significantly associated with source of medical expenses, not going to healthcare facilities  
 163 immediately after symptom recognition, and visiting >3 different healthcare facilities before  
 164 diagnostic confirmation and total diagnostic interval >90 days.

165 In the multi-variable analysis (**Table 2**), the proportion of advanced stage at diagnosis of cervical  
 166 cancer was 1.4 times higher (Adjusted Prevalence Ratio (APR) = 1.44, 95%CI; 1.08, 1.91)  
 167 among those women who paid their medical expenses out of pocket as compared to those women  
 168 who were entitled to free medical service or having health insurance coverage. The proportion  
 169 was 1.3 times higher (APR = 1.31, 95%CI; 1.04, 1.71) among women with total diagnostic  
 170 interval of >90 days than those with ≤ 90 days. Similarly, the proportion of being diagnosed at an  
 171 advanced stage of cervical cancer was 1.25 times higher (APR = 1.25, 95%CI; 1.05, 1.53) among

172 those women who went to religious practices or did nothing immediately after their symptom  
 173 recognition as compared to those women who immediately went to the healthcare facilities, and  
 174 1.2 times higher (APR = 1.24, 95%CI; 1.08, 1.91) among those women who visited >3 different  
 175 healthcare facilities prior to diagnostic confirmation compared to those who visited ≤3 healthcare  
 176 facilities.

177 Table 2: Multi-variable analysis showing factors associated with advanced stage at diagnosis of  
 178 cervical cancer in Addis Ababa residents, 2018

| Variables                                            | Advanced stage |    | Crude PR<br>(95%CI) | Adjusted PR<br>(95%CI) | P value |
|------------------------------------------------------|----------------|----|---------------------|------------------------|---------|
|                                                      | Yes            | No |                     |                        |         |
| <b>Medical expenses</b>                              |                |    |                     |                        |         |
| Out of pocket                                        | 99             | 46 | 1.54 (1.15, 2.05)   | 1.44 (1.08, 1.91)      | 0.003   |
| Free/insured                                         | 29             | 38 | 1.00                | 1.00                   |         |
| <b>Immediate action<br/>after symptom</b>            |                |    |                     |                        |         |
| Went to health facility                              | 80             | 69 | 1.00                | 1.00                   |         |
| No action/ Religious<br>activity                     | 48             | 15 | 1.38 (1.13, 1.69)   | 1.25 (1.05, 1.53)      | 0.02    |
| <b>Number of healthcare<br/>facilities contacted</b> |                |    |                     |                        |         |
| ≤3 healthcare facilities                             | 77             | 65 | 1.00                | 1.00                   |         |
| >3 healthcare facilities                             | 51             | 19 | 1.35 (1.10, 1.65)   | 1.24 (1.07, 1.51)      | 0.01    |
| <b>Diagnostic interval</b>                           |                |    |                     |                        |         |

|          |    |    |                   |                   |      |
|----------|----|----|-------------------|-------------------|------|
| ≤90 days | 33 | 35 | 1.00              | 1.00              |      |
| >90 days | 95 | 49 | 1.45 (1.10, 1.91) | 1.31 (1.04, 1.71) | 0.02 |

## 179 Discussion

180 The present study provides data on cervical cancer stage distribution in Addis Ababa along with  
 181 its predictors based on a population-based study. We found that nearly two-thirds of patients  
 182 with cervical cancer in Addis Ababa were diagnosed at an advanced stage of the disease, and that  
 183 advanced stage at diagnosis was strongly associated with out of pocket medical bill coverage and  
 184 with delays in diagnosis confirmation.

185 Although our finding of high proportion of advanced-stage cervical cancer in Addis Ababa is  
 186 generally similar to findings from other sub-Saharan African countries (8, 11), it is slightly  
 187 higher than that reported from Kenya (53.9%) (9) and lower than that reported from Sudan  
 188 (71.5%) (20). The higher proportion in Sudan in part reflects the predominantly rural resident  
 189 study participants, where access to healthcare facilities is limited and health literacy is expected  
 190 to be lower. In contrast, the lower proportion in the Kenyan study may reflect the higher  
 191 coverage of a recent cervical cancer screening program in the country (14%) (21) as compared to  
 192 Ethiopia (0.6%) (22). Additionally, the screening program created awareness on cervical cancer  
 193 (21).

194 Our findings also showed that the proportion of advanced stage cervical cancer was considerably  
 195 higher among women who waited for more than three months to receive diagnostic confirmation  
 196 after they noticed symptom compared to those waited for ≤3 months. This may in part reflect  
 197 differences in knowledge about cervical cancer early detection and treatments between the two  
 198 groups of women, as well as differences in access to care (10). Thus, there is a need for

1  
2  
3 199 concerted efforts to enhance community awareness about cervical cancer prevention and early  
4  
5 200 detection in order to minimize delays in the diagnosis of the disease.  
6  
7

8  
9 201 More than four out of five patients, who went to practice religious activities immediately after  
10  
11 202 symptom recognition, were found to be diagnosed at advanced stage of cervical cancer. In  
12  
13 203 Ethiopia, it is not uncommon for patients to seek prayer or use holy water (*Tsebel*) as a remedy  
14  
15 204 for their illnesses before turning to conventional medicine. (23). A qualitative study from  
16  
17 205 Ethiopia reported that patients with cervical cancer have a strong belief that *Tsebel* (holy water)”  
18  
19 206 will cure one from the disease (10). Similarly, seeking traditional and religious practices for  
20  
21 207 cervical cancer care has been associated with advanced-stage disease in other parts of Africa (8).  
22  
23  
24

25 208 Financial hardship is a barrier to accessing healthcare, leading to cancer progression and poor  
26  
27 209 outcome (24). Consistent with our findings, previous studies conducted in Sudan (20) and  
28  
29 210 Uganda (11) associated advanced stage with financial difficulties or being uninsured. Another  
30  
31 211 study conducted among gynaecologic cancer patients also reported that women with financial  
32  
33 212 hardship are seven times more likely to avoid or delay their cancer care (25). Providing free  
34  
35 213 diagnostic and treatment services to all women with cervical cancer needs to be incorporated into  
36  
37 214 the governments’ strategy on cervical cancer care. This will be in line with the WHO’s global  
38  
39 215 efforts to ensure universal health coverage (26).  
40  
41  
42  
43  
44

45 216 The strengths of this study is the use of population-based cancer registry to document strong  
46  
47 217 association between late-stage diagnosis and patient and health system factors, including  
48  
49 218 diagnosis delay, in African settings. The registry, however, may not capture all incident cases  
50  
51 219 diagnosed in the city because some patients might have never visited healthcare facilities or  
52  
53 220 visited local healthcare facilities that do not report cases to the cancer registry. Also,  
54  
55  
56  
57  
58  
59  
60



1  
2  
3 221 interpretation of our findings may be affected by recall bias about dates of symptom recognition  
4  
5 222 and presentations though we do not expect the biases differ between patients diagnosed with  
6  
7  
8 223 early and advanced stage diseases.  
9

## 10 11 224 **Conclusions**

12  
13  
14 225 Using a population-based study, we found that more than two-thirds of cervical cancer patients  
15  
16 226 in Addis Ababa are diagnosed at advanced stage of the disease, which was strongly associated  
17  
18 227 with diagnostic delay, failure to take immediate action following symptom recognition, and  
19  
20 228 paying medical bill out of pocket. These findings underscore the need for public health  
21  
22 229 campaigns and programs to raise awareness about the severity of the disease and preventive  
23  
24 230 measures and to expand the availability of screening services, and for policies to improve the  
25  
26 231 affordability of cancer care in the city. Of note, implementing free diagnostic service would  
27  
28 232 ensure accessibility to care for increasing number of patients with precancerous lesion or early-  
29  
30 233 stage disease through the ongoing scaled-up screening program by the Ethiopian government.  
31  
32  
33  
34  
35

## 36 234 **Declarations**

### 37 38 39 235 **Ethics Approval and Consent to Participate**

40  
41  
42 236 This study was approved by the Institutional Review Board (IRB) of Addis Ababa University,  
43  
44 237 College of Health Sciences (Approval number: 005/19/SPH). All participants of the study were  
45  
46 238 informed about the study and they gave their written consent to be included in the study.  
47  
48  
49

### 50 239 **Consent for publication**

51  
52 240 Not applicable  
53  
54  
55  
56  
57  
58  
59  
60

1  
2  
3 241 **Availability of data and material**  
4

5  
6 242 Data can be obtained from the corresponding author upon reasonable request.  
7

8  
9 243 **Author contributions**  
10

11  
12 244 ND, AG, AA, AW, MA, AJ were involved in the conception of the study, methodological design  
13

14 245 of the study, analysis and data interpretation. ND and AJ wrote the first draft of the manuscript.  
15

16 246 AA, WT, EK were involved in the methodology of the study, data collection/extraction,  
17

18  
19 247 visualization of the data and data interpretation. All authors have revised the manuscript.  
20  
21

22 248 **Acknowledgement**  
23  
24

25 249 The authors would like to acknowledge American Cancer Society for funding of the study and  
26

27 250 Addis Ababa University College of Health Sciences for the administrative support. The authors  
28

29  
30 251 are also grateful to the study participants for their cooperation.  
31  
32

33 252  
34  
35  
36  
37  
38  
39  
40  
41  
42  
43  
44  
45  
46  
47  
48  
49  
50  
51  
52  
53  
54  
55  
56  
57  
58  
59  
60

**References**

1. Bray F, Ferlay J, Soerjomataram I, Siegel RL, Torre LA, Jemal A. Global cancer statistics 2018: GLOBOCAN estimates of incidence and mortality worldwide for 36 cancers in 185 countries. *CA Cancer J Clin*. 2018;68(6):394-424.
2. de Martel C, Plummer M, Vignat J, Franceschi S. Worldwide burden of cancer attributable to HPV by site, country and HPV type. *Int J Cancer*. 2017;141(4):664-70.
3. Gauravi AM, Sharmila AP, Surendra SS. An overview of prevention and early detection of cervical cancers. *Indian J Med Paediatr Oncol*. 2011 Jul-Sep;32(3):125–32.
4. Begoihn M, Mathewos A, Aynalem A, Wondemagegnehu T, Moelle U, Gizaw M, et al. Cervical cancer in Ethiopia - predictors of advanced stage and prolonged time to diagnosis. *Infectious agents and cancer*. 2019;14:36.
5. Kantelhardt EJ, Moelle U, Begoihn M, Addissie A, Trocchi P, Yonas B, et al. Cervical cancer in Ethiopia: survival of 1,059 patients who received oncologic therapy. *The oncologist*. 2014;19:727-34
6. Jemal AB, F. Forman, D. O'Brien, M. Ferlay, J. Center, M. Parkin, et al. Cancer burden in Africa and opportunities for prevention. *Cancer*. 2012;118(18):4372-84.
7. Dunyo P, Effah K, Udofia EA. Factors associated with late presentation of cervical cancer cases at a district hospital: a retrospective study. *BMC Public Health*. 2018;18(1):1156.
8. Mlange RM, D. Rambau, P. Kidenya. Patient and disease characteristics associated with late tumour stage at presentation of cervical cancer in northwestern Tanzania. *BMC Womens Health*. 2016;16:5.

- 1  
2  
3 274 9. Kirema MF, Wagoro M, Carole A, Michael H. Socio-Demographic Factors Associated with  
4  
5 275 Advanced Stage of Cervical Cancer at Diagnosis in Kenyatta National Hospital, Kenya: A Cross  
6  
7 276 Sectional Study. *J Cancer Sci Ther.* 2017;9:554-61.
- 8  
9  
10 277 10. Zewdie B, Alemseged A, Tefera B, Amare D, Hailemariam S, Vivien T, et al. Health seeking  
11  
12 278 behavior for cervical cancer in Ethiopia: a qualitative study. *International Journal for Equity in*  
13  
14 279 *Health.* 2012;11(83).
- 15  
16  
17 280 11. Mwaka, Amos DG, Christopher OW, Edward MR, Martin W, Henry L, et al. Social,  
18  
19 281 demographic and healthcare factors associated with stage at diagnosis of cervical cancer: cross-  
20  
21 282 sectional study in a tertiary hospital in Northern Uganda. *BMJ Open.* 2016;6(1):e007690.
- 22  
23  
24 283 12. Genebo T, Asmare S, Assefa M, Adamu A, Solomon B, Tigeneh W, et al. First data from a  
25  
26 284 population based cancer registry in Ethiopia. *Cancer Epidemiology.* 2018;53:93 - 8.
- 27  
28  
29 285 13. FIGO Committee on Gynecologic Oncology. FIGO staging for carcinoma of the vulva,  
30  
31 286 cervix, and corpus uteri. *International Journal of Gynecology & Obstetrics.* 2014;125(2):97-8.
- 32  
33 287 14. C. Marth FL, S. Mahner, M. McCormack, A. Gonzalez-Martin, N. Colombo. Cervical  
34  
35 288 cancer: ESMO Clinical Practice Guidelines for diagnosis, treatment and follow-up. *Annals of*  
36  
37 289 *Oncology* 28 (Supplement 4). 2017.
- 38  
39  
40 290 15. Fatima O, Rahou ZH, Bouchra HR, Rachid B, Bouchra B, Abdelhalem Mesfioui. The  
41  
42 291 Measurement of Delay in Diagnosis and Treatment among Moroccan Women with Cervical  
43  
44 292 Cancer. *Cancer and Oncology Research.* 2017;5(1):10-9.
- 45  
46  
47 293 16. Deepak G, Gita K, Rajan P, Archana A, Jitendra P, Sharad RO. Estimates of delays in  
48  
49 294 diagnosis of cervical cancer in Nepal. *BMC Women's Health.* 2014; 14(29).
- 50  
51  
52 295 17. Deepak G, Jitendra P, Sharad RO. Factors Associated with Late Diagnosis of Cervical  
53  
54 296 Cancer in Nepal. *Asian Pac J Cancer Prev.* 2013;14(7):4373-7.

- 1  
2  
3 297 18. Barros AJ, Hirakata VN. Alternatives for logistic regression in cross-sectional studies: an  
4  
5 298 empirical comparison of models that directly estimate the prevalence ratio. *BMC medical*  
6  
7 299 *research methodology*. 2003;3(1):21.
- 10  
11 300 19. Dereje N, Addissie A, Worku A, Assefa M, Abraha A, Tigeneh W, et al. Extent and  
12  
13 301 Predictors of Delays in Diagnosis of Cervical Cancer in Addis Ababa, Ethiopia: A Population-  
14  
15 302 Based Prospective Study. *JCO Glob Oncol*. 2020;6:277-84.
- 17  
18 303 20. Ibrahim A, Rasch V, Pukkala E, Aro AR. Predictors of cervical cancer being at an advanced  
19  
20 304 stage at diagnosis in Sudan. *International journal of women's health*. 2011;3:385.
- 23  
24 305 21. Ng'ang'a A, Nyangasi M, Nkonge NG, Gathitu E, Kibachio J, Gichangi P, et al. Predictors of  
25  
26 306 cervical cancer screening among Kenyan women: results of a nested case-control study in a  
27  
28 307 nationally representative survey. *BMC Public Health*. 2018;18(3):1221.
- 30  
31 308 22. Bruni L AG, Serrano B, Mena M, Gómez D, Muñoz J, Bosch FX, de Sanjosé S. Human  
32  
33 309 Papillomavirus and Related Diseases in Ethiopia. *ICO/IARC Information Centre on HPV and*  
34  
35 310 *Cancer (HPV Information Centre)*, 2018.
- 37  
38 311 23. Kebede W, Kebede K. Psychosocial experiences and needs of women diagnosed with  
39  
40 312 cervical cancer in Ethiopia. *International social work*. 2017;60(6):1632-46.
- 41  
42 313 24. Perrone F, Jommi C, Di Maio M, Gimigliano A, Gridelli C, Pignata S, et al. The association  
43  
44 314 of financial difficulties with clinical outcomes in cancer patients: secondary analysis of 16  
45  
46 315 academic prospective clinical trials conducted in Italy†. *Annals of Oncology*. 2016;27(12):2224-  
47  
48 316 9.
- 50  
51 317 25. Boubberhan S, Shea M, Kennedy A, Erlinger A, Stack-Dunbier H, Buss MK, et al. Financial  
52  
53 318 toxicity in gynecologic oncology. *Gynecologic Oncology*. 2019;154(1):8-12.

1  
2  
3  
4  
5  
6  
7  
8  
9  
10  
11  
12  
13  
14  
15  
16  
17  
18  
19  
20  
21  
22  
23  
24  
25  
26  
27  
28  
29  
30  
31  
32  
33  
34  
35  
36  
37  
38  
39  
40  
41  
42  
43  
44  
45  
46  
47  
48  
49  
50  
51  
52  
53  
54  
55  
56  
57  
58  
59  
60

319 26. Knaul FM, Bhadelia A, Atun R, Frenk J. Achieving effective universal health coverage and  
320 diagonal approaches to care for chronic illnesses. Health Affairs. 2015;34(9):1514-22.

321

For peer review only

1  
2  
3 322 **Legend of Figure**  
4

5 323 Figure 1: FIGO stages of cervical cancer at diagnosis of patients residing in Addis Ababa, 2018  
6  
7  
8  
9  
10  
11  
12  
13  
14  
15  
16  
17  
18  
19  
20  
21  
22  
23  
24  
25  
26  
27  
28  
29  
30  
31  
32  
33  
34  
35  
36  
37  
38  
39  
40  
41  
42  
43  
44  
45  
46  
47  
48  
49  
50  
51  
52  
53  
54  
55  
56  
57  
58  
59  
60

For peer review only

1  
2  
3  
4  
5  
6  
7  
8  
9  
10  
11  
12  
13  
14  
15  
16  
17  
18  
19  
20  
21  
22  
23  
24  
25  
26  
27  
28  
29  
30  
31  
32  
33  
34  
35  
36  
37  
38  
39  
40  
41  
42  
43  
44  
45  
46  
47  
48  
49  
50  
51  
52  
53  
54  
55  
56  
57  
58  
59  
60



review only



Table: Bivariate association between advanced stage diagnosis of cervical cancer and demographic and clinical characteristics in Addis Ababa, Ethiopia, 2018

| Variables                                         | Advanced stage |            | P value |
|---------------------------------------------------|----------------|------------|---------|
|                                                   | Yes            | No         |         |
| <b>Source of medical expenses</b>                 |                |            |         |
| Out of pocket                                     | 99 (68.3%)     | 46 (31.7%) | 0.001   |
| Free/insured                                      | 29 (43.3%)     | 38 (56.7%) |         |
| <b>Age</b>                                        |                |            |         |
| <40 years                                         | 16 (38.1%)     | 26 (61.9%) | 0.94    |
| 40 – 59 years                                     | 42 (40.8%)     | 61 (59.2%) |         |
| ≥60 years                                         | 26 (38.8%)     | 41 (61.2%) |         |
| <b>Formal education</b>                           |                |            |         |
| No                                                | 54 (62.8%)     | 32 (37.2%) | 0.51    |
| Yes                                               | 74 (58.7%)     | 52 (41.3%) |         |
| <b>Spouse living together</b>                     |                |            |         |
| Yes                                               | 48 (56.5%)     | 37 (43.5%) | 0.42    |
| No                                                | 80 (63.0%)     | 47 (37.0%) |         |
| <b>Family monthly income</b>                      |                |            |         |
| ≤3200 ETB                                         | 88 (61.5%)     | 55 (38.5%) | 0.73    |
| >3200 ETB                                         | 40 (58.0%)     | 29 (42.0%) |         |
| <b>Immediate action after symptom recognition</b> |                |            |         |
| Went to health facility                           | 80 (53.7%)     | 69 (46.3%) | 0.008   |

|                                                                                     |            |            |       |
|-------------------------------------------------------------------------------------|------------|------------|-------|
| No action/ Religious activity                                                       | 48 (76.2%) | 15 (23.8%) |       |
| <b>Number of different health facilities visited before diagnostic conformation</b> |            |            |       |
| ≤3 health facilities                                                                | 77 (54.2%) | 65 (55.8%) | 0.006 |
| >3 health facilities                                                                | 51 (72.9%) | 19 (27.1%) |       |
| <b>Diagnostic interval</b>                                                          |            |            |       |
| ≤90 days                                                                            | 33 (48.5%) | 35 (51.5%) | 0.02  |
| >90 days                                                                            | 95 (66.0%) | 49 (34.0%) |       |
| <b>HIV infection</b>                                                                |            |            |       |
| Yes                                                                                 | 31 (67.4%) | 15 (32.6%) | 0.35  |
| No                                                                                  | 97 (58.4%) | 69 (41.6%) |       |

## STROBE Statement—checklist of items that should be included in reports of observational studies

|                          | Item No. | Recommendation                                                                                                                                                                                                                                                                                                                                                                                                                                                         | Page No.                                                                                 |  |
|--------------------------|----------|------------------------------------------------------------------------------------------------------------------------------------------------------------------------------------------------------------------------------------------------------------------------------------------------------------------------------------------------------------------------------------------------------------------------------------------------------------------------|------------------------------------------------------------------------------------------|--|
| Title and abstract       | 1        | (a) Indicate the study's design with a commonly used term in the title or the abstract                                                                                                                                                                                                                                                                                                                                                                                 | Title page, Page No.1                                                                    |  |
|                          |          | (b) Provide in the abstract an informative and balanced summary of what was done and what was found                                                                                                                                                                                                                                                                                                                                                                    | Abstract, Page No.2                                                                      |  |
| <b>Introduction</b>      |          |                                                                                                                                                                                                                                                                                                                                                                                                                                                                        |                                                                                          |  |
| Background/rationale     | 2        | Explain the scientific background and rationale for the investigation being reported                                                                                                                                                                                                                                                                                                                                                                                   | Introduction, Page No. 4, Paragraph 1 and 2                                              |  |
| Objectives               | 3        | State specific objectives, including any prespecified hypotheses                                                                                                                                                                                                                                                                                                                                                                                                       | Introduction, Page No. 4, Paragraph 2                                                    |  |
| <b>Methods</b>           |          |                                                                                                                                                                                                                                                                                                                                                                                                                                                                        |                                                                                          |  |
| Study design             | 4        | Present key elements of study design early in the paper                                                                                                                                                                                                                                                                                                                                                                                                                | Methods, Page No. 5                                                                      |  |
| Setting                  | 5        | Describe the setting, locations, and relevant dates, including periods of recruitment, exposure, follow-up, and data collection                                                                                                                                                                                                                                                                                                                                        | Methods, Page No. 5                                                                      |  |
| Participants             | 6        | (a) <i>Cohort study</i> —Give the eligibility criteria, and the sources and methods of selection of participants. Describe methods of follow-up<br><i>Case-control study</i> —Give the eligibility criteria, and the sources and methods of case ascertainment and control selection. Give the rationale for the choice of cases and controls<br><i>Cross-sectional study</i> —Give the eligibility criteria, and the sources and methods of selection of participants | Methods, Page No. 5                                                                      |  |
|                          |          | (b) <i>Cohort study</i> —For matched studies, give matching criteria and number of exposed and unexposed<br><i>Case-control study</i> —For matched studies, give matching criteria and the number of controls per case                                                                                                                                                                                                                                                 | N/A                                                                                      |  |
| Variables                | 7        | Clearly define all outcomes, exposures, predictors, potential confounders, and effect modifiers. Give diagnostic criteria, if applicable                                                                                                                                                                                                                                                                                                                               | Methods, Data management and analysis, Page No. 6                                        |  |
| Data sources/measurement | 8*       | For each variable of interest, give sources of data and details of methods of assessment (measurement). Describe comparability of assessment methods if there is more than one group                                                                                                                                                                                                                                                                                   | Methods, Data tools and procedures, Page No. 5                                           |  |
| Bias                     | 9        | Describe any efforts to address potential sources of bias                                                                                                                                                                                                                                                                                                                                                                                                              | Methods, Data tools and procedures, Page No. 5; Data management and analysis, Page No. 6 |  |
| Study size               | 10       | Explain how the study size was arrived at                                                                                                                                                                                                                                                                                                                                                                                                                              | Methods, Page No. 5, study setting                                                       |  |

|                        |     |                                                                                                                                                                                                                                                                                                           |                                                   |  |
|------------------------|-----|-----------------------------------------------------------------------------------------------------------------------------------------------------------------------------------------------------------------------------------------------------------------------------------------------------------|---------------------------------------------------|--|
|                        |     |                                                                                                                                                                                                                                                                                                           | and design                                        |  |
| Quantitative variables | 11  | Explain how quantitative variables were handled in the analyses. If applicable, describe which groupings were chosen and why                                                                                                                                                                              | Methods, Data management and analysis, Page No. 6 |  |
| Statistical methods    | 12  | (a) Describe all statistical methods, including those used to control for confounding                                                                                                                                                                                                                     | Methods, Data management and analysis, Page 6     |  |
|                        |     | (b) Describe any methods used to examine subgroups and interactions                                                                                                                                                                                                                                       | Methods, Data management and analysis, Page No. 6 |  |
|                        |     | (c) Explain how missing data were addressed                                                                                                                                                                                                                                                               | N/A                                               |  |
|                        |     | (d) <i>Cohort study</i> —If applicable, explain how loss to follow-up was addressed<br><i>Case-control study</i> —If applicable, explain how matching of cases and controls was addressed<br><i>Cross-sectional study</i> —If applicable, describe analytical methods taking account of sampling strategy | N/A                                               |  |
|                        |     | (e) Describe any sensitivity analyses                                                                                                                                                                                                                                                                     | N/A                                               |  |
| <b>Results</b>         |     |                                                                                                                                                                                                                                                                                                           |                                                   |  |
| Participants           | 13* | (a) Report numbers of individuals at each stage of study—eg numbers potentially eligible, examined for eligibility, confirmed eligible, included in the study, completing follow-up, and analysed                                                                                                         | N/A                                               |  |
|                        |     | (b) Give reasons for non-participation at each stage                                                                                                                                                                                                                                                      | N/A                                               |  |
|                        |     | (c) Consider use of a flow diagram                                                                                                                                                                                                                                                                        | N/A                                               |  |
| Descriptive data       | 14* | (a) Give characteristics of study participants (eg demographic, clinical, social) and information on exposures and potential confounders                                                                                                                                                                  | Results, Page No. 7 and 8                         |  |
|                        |     | (b) Indicate number of participants with missing data for each variable of interest                                                                                                                                                                                                                       | Results, Page No. 7 and 8                         |  |
|                        |     | (c) <i>Cohort study</i> —Summarise follow-up time (eg, average and total amount)                                                                                                                                                                                                                          | N/A                                               |  |
| Outcome data           | 15* | <i>Cohort study</i> —Report numbers of outcome events or summary measures over time                                                                                                                                                                                                                       | N/A                                               |  |
|                        |     | <i>Case-control study</i> —Report numbers in each exposure category, or summary measures of exposure                                                                                                                                                                                                      | N/A                                               |  |
|                        |     | <i>Cross-sectional study</i> —Report numbers of outcome events or summary measures                                                                                                                                                                                                                        | Results, Page No. 8                               |  |
| Main results           | 16  | (a) Give unadjusted estimates and, if applicable, confounder-adjusted estimates and their precision (eg, 95% confidence interval). Make clear which confounders were adjusted for and why they were included                                                                                              | Results, Page No. 8                               |  |
|                        |     | (b) Report category boundaries when continuous variables were categorized                                                                                                                                                                                                                                 | N/A                                               |  |
|                        |     | (c) If relevant, consider translating estimates of relative risk into absolute risk for a meaningful time period                                                                                                                                                                                          | N/A                                               |  |

Continued on next page

|                          |    |                                                                                                                                                                            |                                         |  |
|--------------------------|----|----------------------------------------------------------------------------------------------------------------------------------------------------------------------------|-----------------------------------------|--|
| Other analyses           | 17 | Report other analyses done—eg analyses of subgroups and interactions, and sensitivity analyses                                                                             | N/A                                     |  |
| <b>Discussion</b>        |    |                                                                                                                                                                            |                                         |  |
| Key results              | 18 | Summarise key results with reference to study objectives                                                                                                                   | Discussion, Page No. 9, first paragraph |  |
| Limitations              | 19 | Discuss limitations of the study, taking into account sources of potential bias or imprecision. Discuss both direction and magnitude of any potential bias                 | Discussion, Page No. 11, last paragraph |  |
| Interpretation           | 20 | Give a cautious overall interpretation of results considering objectives, limitations, multiplicity of analyses, results from similar studies, and other relevant evidence | Conclusions, Page No. 11                |  |
| Generalisability         | 21 | Discuss the generalisability (external validity) of the study results                                                                                                      | Discussion, Page No. 11, last paragraph |  |
| <b>Other information</b> |    |                                                                                                                                                                            |                                         |  |
| Funding                  | 22 | Give the source of funding and the role of the funders for the present study and, if applicable, for the original study on which the present article is based              | Source of funding, Page No. 12          |  |

\*Give information separately for cases and controls in case-control studies and, if applicable, for exposed and unexposed groups in cohort and cross-sectional studies.

**Note:** An Explanation and Elaboration article discusses each checklist item and gives methodological background and published examples of transparent reporting. The STROBE checklist is best used in conjunction with this article (freely available on the Web sites of PLoS Medicine at <http://www.plosmedicine.org/>, Annals of Internal Medicine at <http://www.annals.org/>, and Epidemiology at <http://www.epidem.com/>). Information on the STROBE Initiative is available at [www.strobe-statement.org](http://www.strobe-statement.org).
