# Supplementary material for: Factors associated with advanced stage at diagnosis of cervical cancer in Addis Ababa, Ethiopia: a population-based study
Source: PubMed Central journal article supplement — BMJ Open. 2020 Oct 13;10(10):e040645. doi: 10.1136/bmjopen-2020-040645 (PMC7554500; doi:10.1136/bmjopen-2020-040645), 2020-10-13
Supplement: bmjopen-2020-040645supp001.pdf [file bmjopen-2020-040645supp001.pdf]

Table: Bivariate association between advanced stage diagnosis of cervical cancer and demographic and clinical characteristics in Addis Ababa, Ethiopia, 2018

| Variables                                         | Advanced stage |            | P value |
|---------------------------------------------------|----------------|------------|---------|
|                                                   | Yes            | No         |         |
| <b>Source of medical expenses</b>                 |                |            |         |
| Out of pocket                                     | 99 (68.3%)     | 46 (31.7%) | 0.001   |
| Free/insured                                      | 29 (43.3%)     | 38 (56.7%) |         |
| <b>Age</b>                                        |                |            |         |
| <40 years                                         | 16 (38.1%)     | 26 (61.9%) | 0.94    |
| 40 – 59 years                                     | 42 (40.8%)     | 61 (59.2%) |         |
| ≥60 years                                         | 26 (38.8%)     | 41 (61.2%) |         |
| <b>Formal education</b>                           |                |            |         |
| No                                                | 54 (62.8%)     | 32 (37.2%) | 0.51    |
| Yes                                               | 74 (58.7%)     | 52 (41.3%) |         |
| <b>Spouse living together</b>                     |                |            |         |
| Yes                                               | 48 (56.5%)     | 37 (43.5%) | 0.42    |
| No                                                | 80 (63.0%)     | 47 (37.0%) |         |
| <b>Family monthly income</b>                      |                |            |         |
| ≤3200 ETB                                         | 88 (61.5%)     | 55 (38.5%) | 0.73    |
| >3200 ETB                                         | 40 (58.0%)     | 29 (42.0%) |         |
| <b>Immediate action after symptom recognition</b> |                |            |         |
| Went to health facility                           | 80 (53.7%)     | 69 (46.3%) | 0.008   |

|                                                                                     |            |            |       |
|-------------------------------------------------------------------------------------|------------|------------|-------|
| No action/ Religious activity                                                       | 48 (76.2%) | 15 (23.8%) |       |
| <b>Number of different health facilities visited before diagnostic conformation</b> |            |            |       |
| ≤3 health facilities                                                                | 77 (54.2%) | 65 (55.8%) | 0.006 |
| >3 health facilities                                                                | 51 (72.9%) | 19 (27.1%) |       |
| <b>Diagnostic interval</b>                                                          |            |            |       |
| ≤90 days                                                                            | 33 (48.5%) | 35 (51.5%) | 0.02  |
| >90 days                                                                            | 95 (66.0%) | 49 (34.0%) |       |
| <b>HIV infection</b>                                                                |            |            |       |
| Yes                                                                                 | 31 (67.4%) | 15 (32.6%) | 0.35  |
| No                                                                                  | 97 (58.4%) | 69 (41.6%) |       |
